# Supplementary material
Source: PubMed Central journal article supplement (PMC7010349)
Supplement: supp_7.4.E665_2019-0026-1-at.pdf [file supp_7.4.E665_2019-0026-1-at.pdf]

## Appendix 1 (as supplied by the authors): Supplemental material

**Supplemental Table S1. Search Strategy**

| Database | Search strategy                                                                                                                                                                                                                                                                                                                                                                                                                                                                                                                                                                                                                         |
|----------|-----------------------------------------------------------------------------------------------------------------------------------------------------------------------------------------------------------------------------------------------------------------------------------------------------------------------------------------------------------------------------------------------------------------------------------------------------------------------------------------------------------------------------------------------------------------------------------------------------------------------------------------|
| MEDLINE  | <ol style="list-style-type: none"> <li>1. exp Opiate substitution therapy/</li> <li>2. Methadone/</li> <li>3. Methadone.mp.</li> <li>4. MMT.mp.</li> <li>5. Cannabis/</li> <li>6. Marijuana Abuse/</li> <li>7. Marijuana Smoking/</li> <li>8. Medical Marijuana/</li> <li>9. Cannabis.mp. or marijuana*.mp.</li> <li>10. THC.mp. or hash*.mp. or ganja.mp. or hemp.mp. or bhang*.mp.</li> <li>11. 1 or 2 or 3 or 4</li> <li>12. 5 or 6 or 7 or 8 or 9 or 10</li> <li>13. 11 an 12</li> <li>14. Limit 13 to humans</li> </ol>                                                                                                            |
| EMBASE   | <ol style="list-style-type: none"> <li>1. exp opiate substitution treatment/</li> <li>2. exp methadone treatment/</li> <li>3. exp methadone/</li> <li>4. Methadone.mp.</li> <li>5. MMT.mp.</li> <li>6. exp cannabis/</li> <li>7. exp "cannabis use"/</li> <li>8. exp cannabis addiction/</li> <li>9. exp cannabis smoking/</li> <li>10. exp medical cannabis/</li> <li>11. Cannabis.mp. or marijuana*.mp.</li> <li>12. THC.mp. or hash*.mp. or ganja.mp. or hemp.mp. or bhang*.mp.</li> <li>13. 1 or 2 or 3 or 4 or 5</li> <li>14. 6 or 7 or 8 or 9 or 10 or 11 or 12</li> <li>15. 13 and 14</li> <li>16. Limit 15 to humans</li> </ol> |
| PsycINFO | <ol style="list-style-type: none"> <li>1. exp methadone maintenance/</li> <li>2. methadone.mp.</li> <li>3. MMT.mp.</li> <li>4. exp cannabis/</li> <li>5. exp marijuana usage/</li> <li>6. cannabis.mp. or marijuana*.mp.</li> <li>7. THC.mp. or hash*.mp. or ganja.mp. or hemp.mp. or bhang*.mp.</li> <li>8. 1 or 2 or 3</li> </ol>                                                                                                                                                                                                                                                                                                     |

| Database | Search strategy                                                                                                                                                                                                                                                       |
|----------|-----------------------------------------------------------------------------------------------------------------------------------------------------------------------------------------------------------------------------------------------------------------------|
|          | 9. 4 or 5 or 6 or 7<br>10. 8 and 9<br>11. Limit 10 to humans                                                                                                                                                                                                          |
| CINAHL   | 1. (MH "Methadone")<br>2. "Methadone"<br>3. "MMT"<br>4. (MH "Cannabis")<br>5. (MH "Medical Marijuana")<br>6. "marijuana" or "cannabis"<br>7. "THC" or "hash*" or "ganja" or "hemp*" or "bhang*"<br>8. 1 or 2 or 3<br>9. 4 or 5 or 6<br>10. 7 and 8 (limiters – human) |

## Supplemental Table S2. Individual Study Characteristics by Outcomes

### A. Illicit Opioid Use

| Study             | Country | Study Design                                            | Sample Size (% Female) | Cannabis Use Definition                                                                                                                                                                 | Outcome                                                                                                                                                                             | Statistical Analysis               | Results                                                                                                                                                                                                                                                                                                                |
|-------------------|---------|---------------------------------------------------------|------------------------|-----------------------------------------------------------------------------------------------------------------------------------------------------------------------------------------|-------------------------------------------------------------------------------------------------------------------------------------------------------------------------------------|------------------------------------|------------------------------------------------------------------------------------------------------------------------------------------------------------------------------------------------------------------------------------------------------------------------------------------------------------------------|
| Best, 1999 (1)    | UK      | Cross sectional                                         | 200 (30%)              | <b>Method:</b> MAP<br><b>Definition:</b> Categorical; daily users, occasional users (used cannabis but not on all 30 days in previous months), and non-users<br><b>Timing:</b> Baseline | <b>Method:</b> MAP<br><b>Definition:</b> Continuous ; Mean number of days of heroin use in the past 30 days from MAP<br><b>Timing:</b> Baseline                                     | ANOVA; post-hoc Scheffe test       | F=11.07, p<.0001, such that non-users had more occasions of heroin use than occasional and daily users                                                                                                                                                                                                                 |
| Epstein, 2003 (2) | USA     | Secondary RCT analysis (3 separate analyses), 12 months | 408 (40.44%)           | <b>Method:</b> Diagnostic Interview and urinalysis<br><b>Definition:</b> Dichotomized cannabis use and cannabis abuse/dependence diagnosis<br><b>Timing:</b> Baseline and 12 months     | <b>Method:</b> Urinalysis<br><b>Definition:</b> Relapse to heroin among patients who achieved abstinence (3 consecutive weeks of opioid abstinence)<br><b>Timing:</b> Time to lapse | Cox proportional-hazard regression | <b>Cannabis use:</b> First two trials: HR = 1.54 (0.93–2.56); $\chi^2=2.78$ , p=0.095<br>Third trial: HR = 0.90 (0.48-1.65); $\chi^2=0.13$ , p=0.72<br><b>Cannabis abuse/dependence:</b> First two trials: HR = 1.16 (0.63-2.13); $\chi^2=0.22$ , p=0.64<br>Third trial: HR = 2.09 (0.76-5.76); $\chi^2=1.66$ , p=0.19 |
| Levine, 2015 (3)  | USA     | Retrospective cohort, 1 year                            | 290 (40.34%)           | <b>Method:</b> Urinalysis<br><b>Definition:</b> Dichotomized cannabis use<br><b>Timing:</b> Baseline within the First month of drug testing                                             | <b>Method:</b> Urinalysis<br><b>Definition:</b> Continuous ; Proportion of UDS results negative                                                                                     | Logistic Regression                | Not significant, but statistics not reported.                                                                                                                                                                                                                                                                          |

|                     |        |                                  |              |                                                                                                                                                                                                                                             |                                                                                                                                                                                                    |                               |                                                                                                                                                                                                                                |
|---------------------|--------|----------------------------------|--------------|---------------------------------------------------------------------------------------------------------------------------------------------------------------------------------------------------------------------------------------------|----------------------------------------------------------------------------------------------------------------------------------------------------------------------------------------------------|-------------------------------|--------------------------------------------------------------------------------------------------------------------------------------------------------------------------------------------------------------------------------|
|                     |        |                                  |              | upon entry into MMT                                                                                                                                                                                                                         | for opioids was calculated within the first year<br><b>Timing:</b> 12 months in treatment                                                                                                          |                               |                                                                                                                                                                                                                                |
| Lions, 2014 (4)     | France | Secondary RCT analysis, 45 weeks | 158 (15.19%) | <b>Method:</b> Opiate Treatment Index<br><b>Definition:</b> Dichotomous; Daily users vs. non-daily users<br><b>Timing:</b> Baseline and 12 months                                                                                           | <b>Method:</b> Opiate Treatment Index<br><b>Definition:</b> Dichotomous; Opiate users vs. non-opiate users (used opiates at least once in the past month)<br><b>Timing:</b> 12 months              | Multiple logistic regression  | <b>Pre-treatment daily cannabis:</b> OR=1.46 (0.61-3.77), ns<br><b>In-treatment daily cannabis:</b> OR=2.81 (1.22-6.48), p<.05                                                                                                 |
| Nava, 2007 (5)      | Italy  | Prospective cohort, 12 months    | 121 (14%)    | <b>Method:</b> Self report, Urinalysis<br><b>Definition:</b> Dichotomous; long term users (more than 6 months) and currently smoking at least 7 times per week vs. non-users never exposed to marijuana smoking.<br><b>Timing:</b> Baseline | <b>Method:</b> Urinalysis<br><b>Definition:</b> Continuous ; Percentage positive opioid screens (missing specimens considered positive)<br><b>Timing:</b> Urine samples were collected once a week | Hierarchical linear modelling | <b>Cannabis users:</b> z=-3.42, p<.001, such that there was a reduced percentage of positive opioid urines.<br><b>Non-cannabis users:</b> z=-3.18, p<.001, such that there was a reduced percentage of positive opioid urines. |
| Nirenberg, 1996 (6) | USA    | Prospective cohort, 6 months     | 70 (1.42%)   | <b>Method:</b> Urinalysis<br><b>Definition:</b> Dichotomized cannabis use;                                                                                                                                                                  | <b>Method:</b> Urinalysis;<br><b>Definition:</b> Continuous ;                                                                                                                                      | ANOVA                         | <b>Dichotomized cannabis use:</b> F(1,68)=0.90, p=.35, ns<br><b>Four groups:</b>                                                                                                                                               |

|                       |     |                                        |                      |                                                                                                                                                                                                                                                                                                                                                                                   |                                                                                                                                            |                            |                                                                                                                                                                                                                                                                           |
|-----------------------|-----|----------------------------------------|----------------------|-----------------------------------------------------------------------------------------------------------------------------------------------------------------------------------------------------------------------------------------------------------------------------------------------------------------------------------------------------------------------------------|--------------------------------------------------------------------------------------------------------------------------------------------|----------------------------|---------------------------------------------------------------------------------------------------------------------------------------------------------------------------------------------------------------------------------------------------------------------------|
|                       |     |                                        |                      | and Categorical<br>4 groups: Group<br>1 - cannabis<br>abstainers (0<br>positive<br>screens); Group<br>2 - intermittent<br>cannabis users<br>(0%-33.3%<br>positive<br>screens); Group<br>3 - moderate<br>cannabis users<br>(33.3% to 66.6%<br>positive<br>screens); Group<br>4 - consistent<br>cannabis users<br>(66.6%-100%<br>positive<br>screens)<br><b>Timing:</b> 45<br>weeks | Percentage<br>positive<br>opioid UDS<br><b>Timing:</b> 45<br>weeks                                                                         |                            | F(3,66)=1.13,<br>p=.34, ns                                                                                                                                                                                                                                                |
| Proctor,<br>2016* (7) | USA | Retrospecti<br>ve cohort,<br>12 months | 2410<br>(40.41<br>%) | <b>Method:</b><br>Urinalysis<br><b>Definition:</b><br>Dichotomized<br>cannabis use<br><b>Timing:</b> Intake,<br>3, 6, 9, and 12<br>months                                                                                                                                                                                                                                         | <b>Method:</b><br>Urinalysis<br><b>Definition:</b><br>Dichotomo<br>us; users<br>vs.<br>nonusers<br><b>Timing:</b> 3,<br>6, 9, 12<br>months | Logistic<br>Regression     | <b>3 months:</b> Intake<br>cannabis:<br>OR=1.17 (0.83-<br>1.63)<br><b>6 months:</b> Intake<br>cannabis:<br>OR=0.59 (0.32-<br>1.10)<br><b>9 months:</b> Intake<br>cannabis:<br>OR=0.63 (0.24-<br>1.66)<br><b>12 months:</b><br>Intake cannabis:<br>OR=0.23 (0.05-<br>1.16) |
| Saxon,<br>1996 (8)    | USA | Prospective<br>cohort, 18<br>months    | 353<br>(38.20<br>%)  | <b>Method:</b> Self<br>report<br><b>Definition:</b><br>Categorical;<br>seven-point<br>scale ranging<br>from 0 "never"<br>to 6 "four or<br>more times per<br>day".                                                                                                                                                                                                                 | <b>Method:</b><br>Urinalysis<br><b>Definition:</b><br>Dichotomo<br>us;<br>Considered<br>opioid<br>users if<br>reported<br>use of any       | Cox<br>regression<br>model | r=0.06; B=0.05,<br>ns                                                                                                                                                                                                                                                     |

|                   |         |                                 |              |                                                                                                                                                                                      |                                                                                                                                                                                                                                                                   |                     |                                                                                                                                                                                                    |
|-------------------|---------|---------------------------------|--------------|--------------------------------------------------------------------------------------------------------------------------------------------------------------------------------------|-------------------------------------------------------------------------------------------------------------------------------------------------------------------------------------------------------------------------------------------------------------------|---------------------|----------------------------------------------------------------------------------------------------------------------------------------------------------------------------------------------------|
|                   |         |                                 |              | <b>Timing:</b> 6 months prior to baseline                                                                                                                                            | opioid drug other than their prescribed medication, or if they reported having administered their prescribed medication by snorting or injection in the previous 6 months. Percentage of opioid positive urine screens over 18 months<br><b>Timing:</b> 18 months |                     |                                                                                                                                                                                                    |
| Scavone, 2013 (9) | USA     | Retrospective cohort, 9 months  | 91 (36.56 %) | <b>Method:</b> Self-report, Urinalysis<br><b>Definition:</b> Dichotomized cannabis use<br><b>Timing:</b> Baseline (self-report) and In-treatment (initial 9 months of MMT enrolment) | <b>Method:</b> Urinalysis<br><b>Definition:</b> Continuous<br><b>Timing:</b> 9 months                                                                                                                                                                             | ANCOVA              | r(82)=.018, p=.873, such that there was no significant relationship between frequency of cannabis use in treatment and opiate use.                                                                 |
| Somers, 2012 (10) | Ireland | Retrospective cohort, 15 months | 123          | <b>Method:</b> Urinalysis<br><b>Definition:</b> Dichotomous cannabis use<br><b>Timing:</b> Baseline and in-Treatment; intake, 3, 9 and 15 months                                     | <b>Method:</b> Urinalysis<br><b>Definition:</b> Dichotomous; Subjects with less than 20 % of samples positive for heroin                                                                                                                                          | Logistic regression | <b>Baseline:</b> OR: 0.88 (.67-1.15)<br><b>3 month:</b> OR: 0.79 (.58, 1.1)<br><b>9 month:</b> OR: 0.78 (.55, 1.2)<br><b>15 months:</b> OR: 1.45 (.82, 2.5)<br><b>Total:</b> AOR: 0.32 (.06, 1.66) |

|                      |        |                              |              |                                                                                                                                                                                           |                                                                                                                                                                                                                                                 |                                            |                                                                                                                                                                                                                                                                                                                                                                                                                   |
|----------------------|--------|------------------------------|--------------|-------------------------------------------------------------------------------------------------------------------------------------------------------------------------------------------|-------------------------------------------------------------------------------------------------------------------------------------------------------------------------------------------------------------------------------------------------|--------------------------------------------|-------------------------------------------------------------------------------------------------------------------------------------------------------------------------------------------------------------------------------------------------------------------------------------------------------------------------------------------------------------------------------------------------------------------|
|                      |        |                              |              |                                                                                                                                                                                           | <b>Timing:</b><br>3,9,15<br>months                                                                                                                                                                                                              |                                            |                                                                                                                                                                                                                                                                                                                                                                                                                   |
| Wasserman, 1998 (11) | USA    | Prospective cohort, 6 months | 74 (40.54 %) | <b>Method:</b> Urinalysis<br><b>Definition:</b> Dichotomized cannabis use<br><b>Timing:</b> Baseline cannabis (first week) and cannabis as a time-dependent variable included in analyses | <b>Method:</b> Self-report or urinalysis;<br><b>Definition:</b> Dichotomous; Participants dichotomized as having used heroin during the period from week 2 through the 6-month follow-up assessment or not.<br><b>Timing:</b> 6 month follow-up | Cox proportional hazards regression        | $\chi^2=8.39$ , $p<0.004$ , such that baseline cannabis use significantly increased the risk of a lapse to heroin.<br>$\chi^2=7.62$ , $p<0.006$ , such that cannabis as a time-dependent variable significantly increased the risk of a lapse to heroin.<br><b>6-month follow-up:</b> $\chi^2=7.90$ , $p<0.005$ , such that such that baseline cannabis use significantly increased the risk of a lapse to heroin |
| Zielinski, 2017 (12) | Canada | Cross-sectional              | 777 (46.7% ) | <b>Method:</b> MAP<br><b>Definition:</b> Dichotomized cannabis use in the past 30 days<br><b>Timing:</b> Baseline cannabis                                                                | <b>Method:</b> Urinalysis<br><b>Definition:</b> Dichotomous; participants with any positive screens of illicit opioids<br><b>Timing:</b> 3 month testing period                                                                                 | Multivariable logistic regression analysis | OR: 1.16, 95%CI: 0.77, 1.75, $p=0.49$                                                                                                                                                                                                                                                                                                                                                                             |

Notes: "Dichotomized cannabis use" means users vs. non-users or at least one positive urine screen vs. none unless otherwise specified. MAP: Maudsley Addiction Profile; HR: hazard ratio; ANOVA: analysis of variance; RCT:

randomized controlled trial; ns: not significant; UDS: urine drug screen; MMT: methadone maintenance treatment; ANCOVA: analysis of covariance; OR: odds ratio. \*Proctor et al. (2016) had too many results to present in this table, so we included only intake cannabis values in relation to opioid use at all time points. See study for more results.

## B. Treatment Retention

| Study             | Country | Study Design                      | Sample size (% female) | Cannabis Measurement                                                                                                                                                   | Outcome                                                                                                                                  | Statistical Analysis                                       | Results                                                                                                                                                                      |
|-------------------|---------|-----------------------------------|------------------------|------------------------------------------------------------------------------------------------------------------------------------------------------------------------|------------------------------------------------------------------------------------------------------------------------------------------|------------------------------------------------------------|------------------------------------------------------------------------------------------------------------------------------------------------------------------------------|
| Epstein, 2003 (2) | USA     | Secondary RCT analysis, 12 months | 408 (40.44%)           | <b>Method:</b> Diagnostic Interview and urinalysis<br><b>Definition:</b> Categorical; Non-users, occasional users and frequent users<br><b>Timing:</b> Time to dropout | <b>Definition:</b> Retention in clinical trials up till follow up<br><b>Timing:</b> Did they complete the follow ups to 12 months        | Survival analysis for treatment retention for all 3 trials | In all 3 trials, p-values ranged from p=.69 to p=.72 Further statistics not reported.                                                                                        |
| Joe, 1998 (13)    | USA     | Prospective cohort, 360 days      | 981 (39%)              | <b>Method:</b> Self-report<br><b>Definition:</b> Dichotomous; At least weekly marijuana use or not<br><b>Timing:</b> Baseline                                          | <b>Definition:</b> Whether clients stayed at least 360 days in outpatient methadone treatment.<br><b>Timing:</b> 360 days into treatment | Hierarchical linear regression model                       | b=0.13, SE=0.16, t=0.79, OR=1.14, ns                                                                                                                                         |
| Levine, 2015 (3)  | USA     | Retrospective cohort, 1 year      | 290 (40.34%)           | <b>Method:</b> Urinalysis<br><b>Definition:</b> Dichotomized cannabis use<br><b>Timing:</b> Baseline within the First month of drug testing upon entry into MMT        | <b>Definition:</b> Dichotomized into two groups: less than a year and more than a year<br><b>Timing:</b> 12 months after treatment       | Logistic regression                                        | <b>Men:</b> cannabis-negative: OR=5.00 (1.61-14.29), p=.01, such that less cannabis use predicted >1 year retention<br><b>Women</b> cannabis-negative: OR=9.09 (2.33-33.33), |



|                  |                |                               |              |                                                                                                                                                                                                                                             |                                                                                                                                                                                         |                                                                        |                                                                                              |
|------------------|----------------|-------------------------------|--------------|---------------------------------------------------------------------------------------------------------------------------------------------------------------------------------------------------------------------------------------------|-----------------------------------------------------------------------------------------------------------------------------------------------------------------------------------------|------------------------------------------------------------------------|----------------------------------------------------------------------------------------------|
|                  |                |                               |              |                                                                                                                                                                                                                                             |                                                                                                                                                                                         |                                                                        | p<.001, such that less cannabis use predicted >1 year retention                              |
| Nava, 2007 (5)   | Italy          | Prospective cohort, 12 months | 121 (13.22%) | <b>Method:</b> Self report, Urinalysis<br><b>Definition:</b> Dichotomous; long term users (more than 6 months) and currently smoking at least 7 times per week vs. non-users never exposed to marijuana smoking.<br><b>Timing:</b> Baseline | <b>Definition:</b> Percentage dropout from treatment measured<br><b>Timing:</b> 2 weeks, 3 months, and 12 months                                                                        | Kaplan-Meier survival analysis                                         | No significant association (values not reported).                                            |
| Peles, 2006 (14) | Israel         | Prospective cohort, 11 years  | 492 (27.24%) | <b>Method:</b> Urinalysis<br><b>Definition:</b> Dichotomized cannabis use<br><b>Timing:</b> 13 months or month before dropout                                                                                                               | <b>Definition:</b> Continuous; The number of days in clinic from first admission until the patient quit treatment or until the end of follow-up (11 years)<br><b>Timing:</b> 132 months | Fishers exact test                                                     | <b>Cannabis use on admission:</b> p=0.3, ns                                                  |
| Peles, 2008 (15) | USA and Israel | Prospective cohort, 12 months | 794 (30.98%) | <b>Method:</b> Weekly urinalysis;<br><b>Definition:</b> Dichotomized cannabis use<br><b>Timing:</b> Baseline and                                                                                                                            | <b>Definition:</b> Continuous; Duration in clinic from first admission until the patient                                                                                                | Kaplan-Meier survival analysis with log rank for cumulative retention. | <b>Tel Aviv:</b> Positive THC on admission: log rank=0.2, p=.8<br>Positive THC after 1 year: |

|                      |     |                                       |                     |                                                                                                                                                                                                                                            |                                                                                                                                                                                      |                                       |                                                                                                                                                                                                                                                                     |
|----------------------|-----|---------------------------------------|---------------------|--------------------------------------------------------------------------------------------------------------------------------------------------------------------------------------------------------------------------------------------|--------------------------------------------------------------------------------------------------------------------------------------------------------------------------------------|---------------------------------------|---------------------------------------------------------------------------------------------------------------------------------------------------------------------------------------------------------------------------------------------------------------------|
|                      |     |                                       |                     | in-treatment<br>For follow-up,<br>recorded<br>cannabis use<br>month after<br>completion or<br>one month<br>before if early<br>dropout                                                                                                      | stopped<br>treatment or<br>until the end<br>of the follow-<br>up<br><b>Timing:</b><br>Analyzed 6<br>months<br>retention<br>and 1 year<br>retention in<br>treatment                   |                                       | log rank=1.8,<br>p=.2<br><b>Las Vegas:</b><br>Positive THC<br>on<br>admission:<br>log rank=4.2,<br>p=.04<br>Positive THC<br>after 1 year:<br>log rank=0.8,<br>p=.4<br>Included in<br>multivariate<br>analysis but<br>not<br>significant<br>(values not<br>provided) |
| Saxon,<br>1996 (8)   | USA | Prospective<br>cohort, 18<br>months   | 353<br>(38.20%<br>) | <b>Method:</b> Self<br>report<br><b>Definition:</b><br>Categorical;<br>seven-point<br>scale ranging<br>from 0<br>"never" to 6<br>"four or more<br>times per<br>day".<br><b>Timing:</b> 6<br>months prior<br>to baseline                    | <b>Definition:</b><br>subjects<br>remaining in<br>treatment<br>continuously<br>after<br>enrolment<br>and those<br>not<br>remaining<br><b>Timing:</b> 18<br>months after<br>enrolment | Cox<br>regression<br>analysis         | r=0.06;<br>B=1.08 (0.97-<br>1.2), ns                                                                                                                                                                                                                                |
| Scavone,<br>2013 (9) | USA | Retrospectiv<br>e cohort, 9<br>months | 91<br>(39.56%<br>)  | <b>Method:</b> Self-<br>report,<br>Urinalysis<br><b>Definition:</b><br>Dichotomized<br>cannabis use<br><b>Timing:</b><br>Baseline (self-<br>report) and<br>In-treatment<br>(urinalysis<br>from initial 9<br>months of<br>MMT<br>enrolment) | <b>Definition:</b><br>Mean<br>number of<br>patients<br>dropped out<br><b>Timing:</b> 9<br>months into<br>treatment                                                                   | Pearson<br>correlation,<br>chi square | Unfavourabl<br>e discharge<br>status:<br>r(80)=.069,<br>p=.567, ns<br>Premature<br>discharge<br>status:<br>$\chi^2 = 3.009$ ,<br>p=.222, ns                                                                                                                         |

|                    |        |                                 |                |                                                                                                                                                                                                                                                                                                                                                                                                                        |                                                                                                                                                                     |                                  |                                                                                                                                                                                  |
|--------------------|--------|---------------------------------|----------------|------------------------------------------------------------------------------------------------------------------------------------------------------------------------------------------------------------------------------------------------------------------------------------------------------------------------------------------------------------------------------------------------------------------------|---------------------------------------------------------------------------------------------------------------------------------------------------------------------|----------------------------------|----------------------------------------------------------------------------------------------------------------------------------------------------------------------------------|
| Schiff, 2007 (16)  | Israel | Retrospective cohort, 13 months | 2,683 (14.07%) | <b>Method:</b> Urinalysis<br><b>Definition:</b> Dichotomized cannabis use<br><b>Timing:</b> Baseline and in-treatment; 13 months into treatment                                                                                                                                                                                                                                                                        | <b>Definition:</b> Dichotomized patients as 100% retention vs. lower<br><b>Timing:</b> 13 months into treatment                                                     | Logistic regression              | OR=1.43 (1.15, 1.78), p<.001, such that there was a significant relationship between cannabis use and increased retention.                                                       |
| Weizman, 2004 (17) | Israel | Prospective cohort, 12 months   | 283 (NR)       | <b>Method:</b> Urinalysis<br><b>Definition:</b> Dichotomous; Cannabis abuse vs. not; First assessed the percentage of tests positive for a given month (first month and 12th month); second considered that is a patient tested positive for cannabis for any consecutive 3 months during the first year of MMT, was considered a potential cannabis abuser. SCID used to confirm or disconfirm cannabis abuse status. | <b>Definition:</b> Treatment tenure was calculated based upon the overall number of days patients remained in treatment;<br><b>Timing:</b> 12 months into treatment | Cox regression survival analysis | Non-CAs vs CAs, B=-0.17; SE=0.13; Wald=1.57, p=0.21; r=0.00; Exp(B)=0.84<br>Analysis with heroin, cocaine, and BZD abuse as covariates did not significantly change the results. |

|                  |     |                                    |              |                                                                                                                  |                                                                                                            |                                     |                                                                                                                                                                                                                                      |
|------------------|-----|------------------------------------|--------------|------------------------------------------------------------------------------------------------------------------|------------------------------------------------------------------------------------------------------------|-------------------------------------|--------------------------------------------------------------------------------------------------------------------------------------------------------------------------------------------------------------------------------------|
|                  |     |                                    |              | <b>Timing:</b><br>Baseline and 12 months                                                                         |                                                                                                            |                                     |                                                                                                                                                                                                                                      |
| White, 2014 (18) | USA | Retrospective cohort, 15-17 months | 604 (39.40%) | <b>Method:</b><br>Urinalysis<br><b>Definition:</b><br>Dichotomized cannabis use<br><b>Timing:</b> First 3 months | <b>Definition:</b><br>Dichotomized retention as left MMT or remained in MMT<br><b>Timing:</b> 15-17 months | Chi square<br>Fishers<br>Exact Test | <b>Baseline cannabis use:</b><br>OR: 3.3 (1.6-6.8), p<.01, such that cannabis use was significantly associated with increased attrition rates.<br><b>Positive ONLY for cannabis at baseline:</b> 5%<br>OR: 0.5 (0.7-9.8), p=1.00, ns |

Notes: "Dichotomized cannabis use" means users vs. non-users or at least one positive urine screen vs. none unless otherwise specified. RCT: randomized controlled trial; SE: standard error; OR: odds ratio; ns: not significant; MMT: methadone maintenance treatment; THC: tetrahydrocannabinol; NR: not reported; SCID: Structured Clinical Interview for DSM disorders; CA: cannabis abuser.

### C. Polydrug Use

| Study             | Country | Study Design                  | Sample size (% female) | Cannabis Measurement                                                                                                                                                                                                                                                       | Outcome                                                                                                                                                                       | Statistical Analysis         | Results                                                                                                                                                                                                                                                                                                                          |
|-------------------|---------|-------------------------------|------------------------|----------------------------------------------------------------------------------------------------------------------------------------------------------------------------------------------------------------------------------------------------------------------------|-------------------------------------------------------------------------------------------------------------------------------------------------------------------------------|------------------------------|----------------------------------------------------------------------------------------------------------------------------------------------------------------------------------------------------------------------------------------------------------------------------------------------------------------------------------|
| Best, 1999 (1)    | UK      | Cross sectional               | 200 (30%)              | <b>Method:</b> MAP<br><b>Definition:</b> Classified participants as daily users, occasional users, and non-users; categorical<br><b>Timing:</b> Baseline                                                                                                                   | <b>Method:</b> MAP<br><b>Definition:</b> Measured alcohol and crack cocaine use; continuous<br><b>Timing:</b> 30 days after MAP                                               | ANOVA; post-hoc Scheffe test | <b>Alcohol:</b> F=5.24, p<.01<br>Scheffe test: significant difference such that non-users of cannabis consumed more alcohol than occasional and daily users<br><b>Crack cocaine:</b> F=4.67, p<.05<br>Scheffe test: significant difference such that non-users of cannabis consumed more alcohol than occasional and daily users |
| Bleich, 1999 (19) | Israel  | Prospective cohort, 12 months | 148 (29.82%)           | <b>Method:</b> Urinalysis<br><b>Definition:</b> A positive urine test for cannabis. A drug abuser for any substance of abuse was defined as having a positive urine test for that substance during the 12th month of treatment.<br><b>Timing:</b> 12 months into treatment | <b>Method:</b> Urinalysis<br><b>Definition:</b> Benzodiazepines; A positive urine test for benzodiazepines non-abusers vs. abusers<br><b>Timing:</b> 12 months into treatment | Chi square                   | <b>Benzodiazepine:</b> $\chi^2 = 7.77$ , p=0.005, such that benzodiazepine abusers were more likely to currently abuse cannabis than non-abusers of benzodiazepine                                                                                                                                                               |

|                     |     |                                   |              |                                                                                                                                                                                                                                                                                                                                                                                |                                                                                                                                 |                            |                                                                                                                                                                                                                                                                                                        |
|---------------------|-----|-----------------------------------|--------------|--------------------------------------------------------------------------------------------------------------------------------------------------------------------------------------------------------------------------------------------------------------------------------------------------------------------------------------------------------------------------------|---------------------------------------------------------------------------------------------------------------------------------|----------------------------|--------------------------------------------------------------------------------------------------------------------------------------------------------------------------------------------------------------------------------------------------------------------------------------------------------|
| Epstein, 2003 (2)   | USA | Secondary RCT analysis, 12 months | 408 (40.44%) | <b>Method:</b> Diagnostic Interview and urinalysis<br><b>Definition:</b> Categorical; Non-users, occasional users and frequent users<br><b>Timing:</b> Baseline and 12 months                                                                                                                                                                                                  | <b>Method:</b> Urinalysis<br><b>Definition:</b> Continuous; Cocaine use from urinalysis<br><b>Timing:</b> Entire study duration | Multiple linear regression | <b>Cocaine abstinence:</b> Parameter estimate +/- SEM: 11.49 +/- 5.68, t=2.02, p=0.0438                                                                                                                                                                                                                |
| Nirenberg, 1996 (6) | USA | Prospective cohort, 45 weeks      | 70 (1.43%)   | <b>Method:</b> Urinalysis<br><b>Definition:</b> Dichotomous and Categorical; 4 groups: Group 1 - cannabis abstiners (0 positive screens); Group 2 - intermittent cannabis users (0%-33.3% positive screens); Group 3 - moderate cannabis users (33.3% to 66.6% positive screens); Group 4 - consistent cannabis users (66.6%-100% positive screens)<br><b>Timing:</b> 45 weeks | <b>Method:</b> Urinalysis<br><b>Definition:</b> Continuous; Cocaine and benzodiazepine use<br><b>Timing:</b> 45 weeks           | ANOVA                      | <b>Cocaine:</b> F(3,66)=1.17, p=.33 such that there was no significant difference between the 4 cannabis groups and their use of cocaine.<br><b>Benzodiazepines:</b> F(3,66)=2.10, p=.11, such that there was no significant difference between the 4 cannabis groups and their use of benzodiazepine. |

|                   |     |                                  |              |                                                                                                                                                                                                                                                                                          |                                                                                                                                                                                                          |                        |                                                                                                                                                                                                                                                                                         |
|-------------------|-----|----------------------------------|--------------|------------------------------------------------------------------------------------------------------------------------------------------------------------------------------------------------------------------------------------------------------------------------------------------|----------------------------------------------------------------------------------------------------------------------------------------------------------------------------------------------------------|------------------------|-----------------------------------------------------------------------------------------------------------------------------------------------------------------------------------------------------------------------------------------------------------------------------------------|
| Peirce, 2009 (20) | USA | Secondary RCT analysis, 12 weeks | 386 (44%)    | <b>Method:</b> Urinalysis, breath sample<br><b>Definition:</b> Cannabis use defined as positive urine/breath sample given at study intake<br><b>Timing:</b> at intake<br>Cannabis use disorder defined as the interview administered checklist of DSM-IV substance use disorder symptoms | <b>Method:</b> Urinalysis, breath sample<br><b>Definition:</b> Stimulant use measured as number of stimulant-negative urine results provided<br><b>Timing:</b> Throughout the 12 week study intervention | Mixed-model regression | <b>Cannabis use at intake:</b> B(SE) = -3.27 (1.33), p=0.014, such that participants showed more stimulant use (less negative urine tests).<br><b>Cannabis use disorder:</b> B(SE) = 3.89(1.49), p=0.010, such that participants showed less stimulant use (more negative urine tests). |
| Saxon, 1996 (8)   | USA | Prospective cohort, 18 months    | 353 (38.20%) | <b>Method:</b> Self-reported seven-point scale ranging from 0 "never" to 6 "four or more times per day".<br><b>Definition:</b> Categorical;<br><b>Timing:</b> 6 months prior to baseline                                                                                                 | <b>Method:</b> Urinalysis<br><b>Definition:</b> Continuous; percentage positive urine screens for any drug use then cocaine use, specifically<br><b>Timing:</b> 18 months in treatment                   | Cox regression model   | <b>Any drug use:</b> Model 1: r=-0.05; B=0.06<br>Not included in second model.<br><b>Cocaine use:</b> Model 1: r=-0.08; B=-0.09<br>Model 2: B=-0.11, p<0.05, such that pre-treatment frequency of cannabis use predicted less cocaine use                                               |
| Saxon, 1993 (21)  | USA | Cross sectional                  | 98 (0%)      | <b>Method:</b> Urinalysis;<br><b>Definition:</b> Dichotomized cannabis use<br><b>Timing:</b> During the study period, specimens                                                                                                                                                          | <b>Method:</b> Urinalysis<br><b>Definition:</b> Continuous; screened for opiates, cocaine, and benzodiazepines.<br><b>Timing:</b> Weekly tests during entire treatment                                   | Mann-Whitney U-test    | <b>THC+ vs. THC-:</b> Percentage of urinalysis positive for other drugs of abuse was not significantly different between THC+ (median=6.5, mean                                                                                                                                         |

|                   |     |                                |             |                                                                                                                                                                                                                                            |                                                                                                                                                   |             |                                                                                                                                                                                                                                                                                                                               |
|-------------------|-----|--------------------------------|-------------|--------------------------------------------------------------------------------------------------------------------------------------------------------------------------------------------------------------------------------------------|---------------------------------------------------------------------------------------------------------------------------------------------------|-------------|-------------------------------------------------------------------------------------------------------------------------------------------------------------------------------------------------------------------------------------------------------------------------------------------------------------------------------|
|                   |     |                                |             | were periodically tested for THC. The number of tests for THC per subject varied from 1 to 17 (median=4). THC testing was generally spread over the duration of the study so that subjects were tested periodically over a span of months. |                                                                                                                                                   |             | rank=50.74) and THC-patients (median=6.3, mean rank=48.0; z=-0.48).<br><b>Consistently THC+:</b> Participants consistently THC+ had a smaller percentage of urinalysis positive for other drugs of abuse (median=3.25, mean rank=21.7) than those who were intermittently THC+ (median=8.2, mean rank=31.5; z=-2.27, p<0.05). |
| Scavone, 2013 (9) | USA | Retrospective cohort, 9 months | 91 (39.56%) | <b>Method:</b> Self-report, Urinalysis<br><b>Definition:</b> Dichotomized cannabis use<br><b>Timing:</b> Baseline (self-report) and In-treatment (urinalysis from initial 9 months of MMT enrolment)                                       | <b>Method:</b> Urinalysis<br><b>Definition:</b> Any illicit benzodiazepine use<br><b>Timing:</b> In-treatment (Initial 9 months of MMT enrolment) | Correlation | <b>Benzodiazepine:</b> r(91)=.374, p<.01, such that there was a positive correlation between rates of cannabis use and illicit benzodiazepine use during the initial nine months in treatment                                                                                                                                 |
| Strain, 1991 (22) | USA | Cross sectional                | 66 (45%)    | <b>Method:</b> Alcohol Research Center Intake Interview                                                                                                                                                                                    | <b>Method:</b> Alcohol Research Center Intake Interview<br><b>Definition:</b> Cocaine, sedative, and                                              | Z-Test      | <b>Cocaine diagnosis:</b> RR=0.69, ns<br><b>Sedative diagnosis:</b> RR=1.67, ns                                                                                                                                                                                                                                               |



|                    |        |                               |          |                                                                                                                                                                                                                                                                                                                                                                                              |                                                                                                                                                                                                                                                |       |                                                                                                                                                                                                                                                                                                                                                                                                             |
|--------------------|--------|-------------------------------|----------|----------------------------------------------------------------------------------------------------------------------------------------------------------------------------------------------------------------------------------------------------------------------------------------------------------------------------------------------------------------------------------------------|------------------------------------------------------------------------------------------------------------------------------------------------------------------------------------------------------------------------------------------------|-------|-------------------------------------------------------------------------------------------------------------------------------------------------------------------------------------------------------------------------------------------------------------------------------------------------------------------------------------------------------------------------------------------------------------|
|                    |        |                               |          | <p><b>Definition:</b><br/>Dichotomous; those with versus those without a history of a cannabis use diagnosis</p> <p><b>Timing:</b><br/>Interviews and assessments done in a series of two to three sessions</p>                                                                                                                                                                              | <p>alcohol abuse/dependence diagnoses</p> <p><b>Timing:</b><br/>Interviews and assessments done in a series of two to three sessions</p>                                                                                                       |       | <p><b>Alcohol diagnosis:</b><br/>RR=0.83, ns</p>                                                                                                                                                                                                                                                                                                                                                            |
| Weizman, 2004 (17) | Israel | Prospective cohort, 12 months | 283 (NR) | <p><b>Method:</b><br/>Urinalysis</p> <p><b>Definition:</b><br/>Dichotomous; Cannabis abuse vs. not; First assessed the percentage of tests positive for a given month (first month and 12th month); second considered that is a patient tested positive for cannabis for any consecutive 3 months during the first year of MMT, was considered a potential cannabis abuser. SCID used to</p> | <p><b>Method:</b><br/>Urinalysis;</p> <p><b>Definition:</b><br/>Measured heroin, benzodiazepines, amphetamine, and cocaine abuse (they do not specify if they used SCID or something else to define abuse)</p> <p><b>Timing:</b> 12 months</p> | ANOVA | <p><b>Benzodiazepines:</b><br/>F=18.48, p=0.000, such that CAs abused more benzodiazepines</p> <p><b>Amphetamines:</b><br/>F=9.29, p=0.003, such that CAs abused more amphetamines</p> <p><b>Cocaine:</b><br/>F=4.06, p=0.045, such that CAs abused more cocaine</p> <p><b>All abuse and dependency diagnoses:</b><br/>F=7.5, p=0.007, such that CAs had more other drug abuse and dependency diagnoses</p> |

|  |  |  |  |                                                                                          |  |  |  |
|--|--|--|--|------------------------------------------------------------------------------------------|--|--|--|
|  |  |  |  | confirm or disconfirm cannabis abuse status.<br><b>Timing:</b><br>Baseline and 12 months |  |  |  |
|--|--|--|--|------------------------------------------------------------------------------------------|--|--|--|

Notes: "Dichotomized cannabis use" means users vs. non-users or at least one positive urine screen vs. none unless otherwise specified. MAP: Maudsley Addiction Profile; ANOVA: analysis of variance; RCT: randomized controlled trial; SEM: standard error of the mean; DSM-IV: Diagnostic and Statistical Manual of Mental Disorders, 4<sup>th</sup> Edition; SE: standard error; THC: tetrahydrocannabinol; MMT: methadone maintenance treatment; RR: risk ratio; CA: cannabis abuser; SCID: Structured Clinical Interview for DSM disorders.

**Supplemental Figure S1.** Funnel plot evaluating publication bias for illicit opioid use

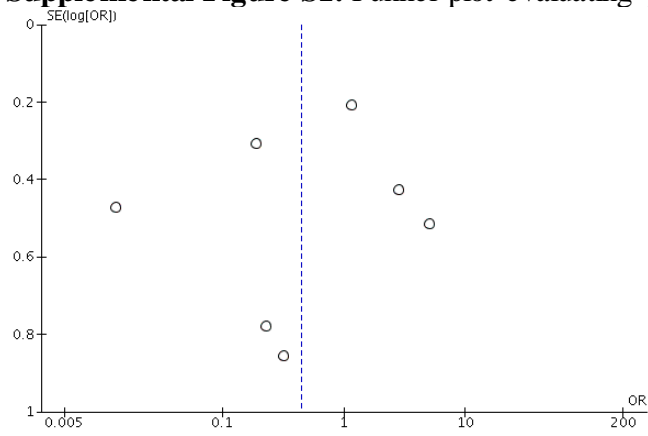

**Supplemental Figure S2.** Funnel plot evaluating publication bias for treatment retention.

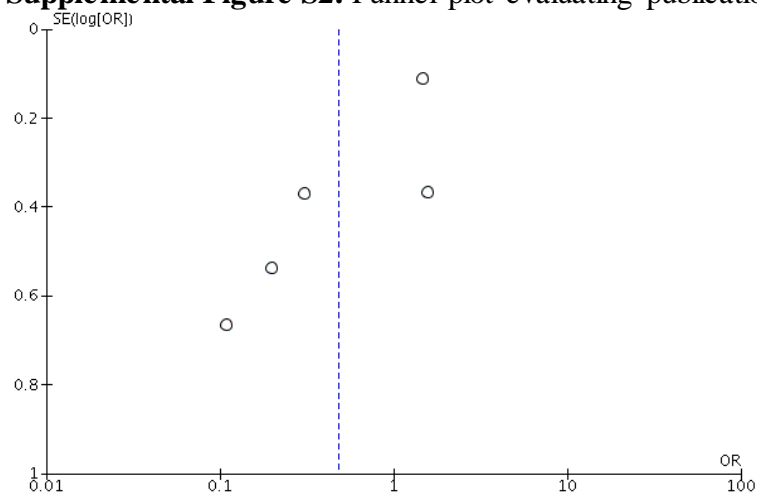

**Supplemental Figure S3. Illicit opioid use during treatment by cannabis use meta-analysis**  
**A. Meta-analysis forest plot for illicit opioid use**

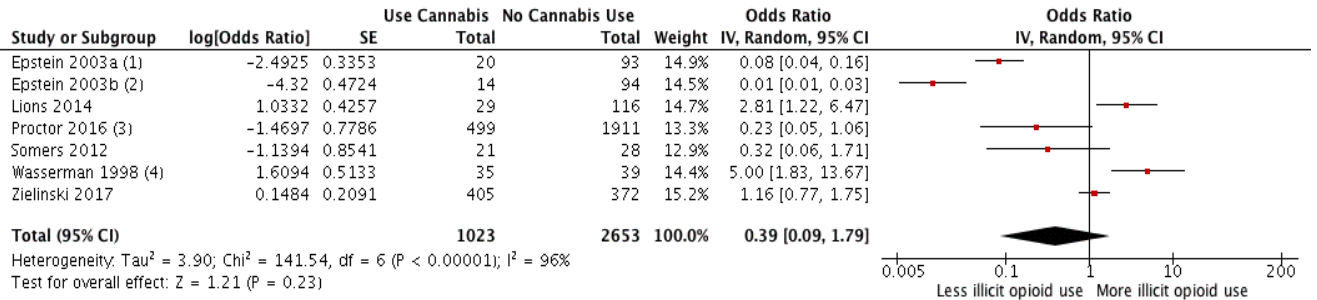

**Footnotes**

- (1) Combined results of two trials which were 8 weeks long
- (2) Results from one trial that was 12 weeks long
- (3) Prevalence reflects 12-month cannabis use, as baseline prevalence was not reported. Odds ratio reflects baseline cannabis use and 12-month opioid use.
- (4) Odds ratio as estimated in Epstein 2003

**B. Subgroup meta-analysis stratified by measure of cannabis use**

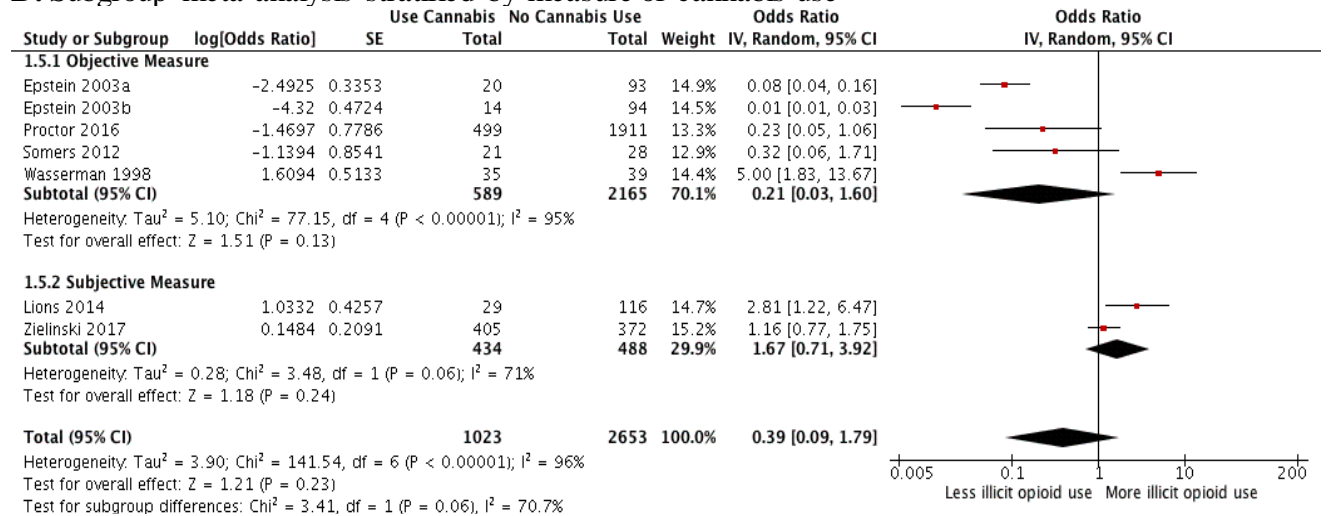

**C. Subgroup meta-analysis stratified by region**

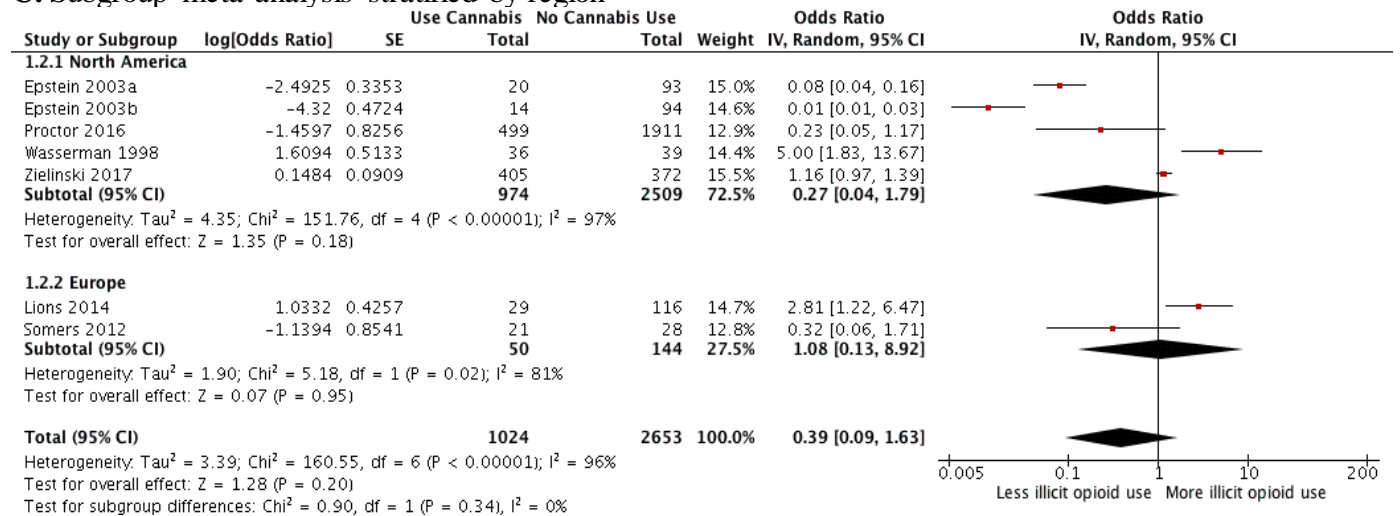

## Supplemental Figure S4. Treatment retention meta-analysis

### A. Meta-analysis forest plot for treatment retention

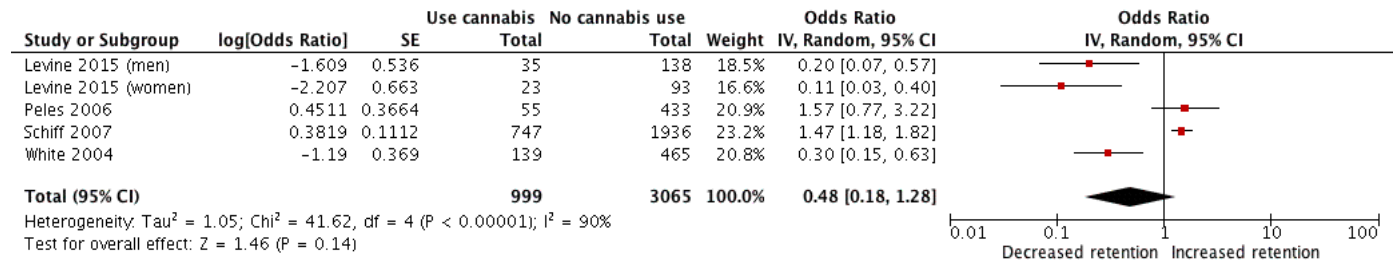

### B. Subgroup meta-analysis stratified by country

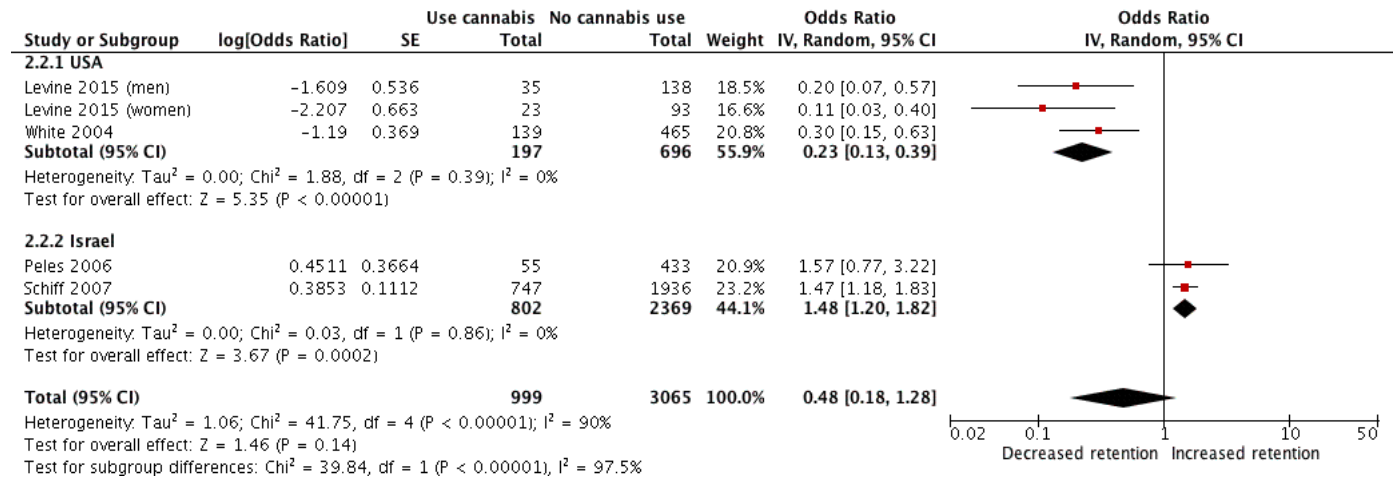

### Supplemental Statistical Methods:

Many of the odds ratios necessary for the meta-analyses were not reported in the publications we've referenced. Here we document how the statistics were calculated.

#### Formula for Standard Error:

$$SE(\log(OR)) = \sqrt{\frac{1}{a} + \frac{1}{b} + \frac{1}{c} + \frac{1}{d}}$$

a = cannabis positive AND opioid positive

b = cannabis negative AND opioid negative

c = cannabis positive AND opioid negative

d = cannabis negative AND opioid positive

#### Calculation for Epstein 2003a:

- Opiate study + Cocaine study #1
- State that rate of relapse is 80% in non-users of cannabis
- N cannabis users = 126 (frequent + non-frequent users in cocaine study 1 and opiate study)
- N non-cannabis users = 89
- 113 absent from illicit opioids

OR = 0.189, SE = 0.307

2x2 Table

|            | + opioids | - opioids | Total |
|------------|-----------|-----------|-------|
| + cannabis | 31        | 95        | 126   |
| - cannabis | 71        | 18        | 89    |
| Total      | 102       | 113       | 215   |

**Calculation for Epstein 2003b:**

- Cocaine study #2
- Rate of relapse is 90% in non-users
- N cannabis users = 94
- N non-cannabis users = 99
- 94 absent from illicit opioids in total

OR = 0.013376, SE = 0.4724

OR = a\*d/b\*c

100/7476 = 0.013376

|            | + opioids | - opioids | Total |
|------------|-----------|-----------|-------|
| + Cannabis | 10        | 84        | 94    |
| - Cannabis | 89        | 10        | 99    |
| Total      | 99        | 94        | 193   |

**Calculation for Wasserman 1998:**

- **Information and relative risk calculation collected from Epstein et al., 2003**
- 35 people tested positive for cannabis
- Sample size is 74
- Opioid positives detected in 30 patients
- N non-cannabis users = 39
- 44 absent from illicit opioids
- Relative risk is (21/35)/(9/36) = 2.6

OR = 5.00, SE = 0.5133

**References**

1. Best D, Gossop M, Greenwood J, Marsden J, Lehmann P, Strang J. Cannabis use in relation to illicit drug use and health problems among opiate misusers in treatment. *Drug Alcohol Rev.* 1999;18(January 1998):31–8.
2. Epstein DH, Preston KL. Does cannabis use predict poor outcome for heroin-dependent patients on maintenance treatment? Past findings and more evidence against. *Addiction.* 2003;98(3):269–79.
3. Levine AR, Lundahl LH, Ledgerwood DM, Lisieski M, Rhodes GL, Greenwald MK. Gender-Specific Predictors of Retention and Opioid Abstinence During Methadone Maintenance Treatment. *J Subst Abuse Treat [Internet].* 2015;54:37–43. Available from: <http://dx.doi.org/10.1016/j.jsat.2015.01.009>

4. Lions C, Carrieri MP, Michel L, Mora M, Marcellin F, Morel A, et al. Predictors of non-prescribed opioid use after one year of methadone treatment: An attributable-risk approach (ANRS-Methaville trial). *Drug Alcohol Depend* [Internet]. 2014;135(1):1–8. Available from: <http://dx.doi.org/10.1016/j.drugalcdep.2013.10.018>
5. Nava F, Manzato E, Lucchini A. Chronic cannabis use does not affect the normalization of hypothalamic-pituitary-adrenal (HPA) axis induced by methadone in heroin addicts. *Prog Neuro-Psychopharmacology Biol Psychiatry*. 2007;31(5):1089–94.
6. Nirenberg TD, Cellucci T, Liepman MR, Swift RM, Sirota AID. Cannabis versus other illicit drug use among methadone maintenance patients. Vol. 10, *Psychology of addictive behaviours*. 1996. p. 222–7.
7. Proctor SL, Copeland AL, Kopak AM, Hoffmann NG, Herschman PL, Polukhina N. Outcome predictors for patients receiving methadone maintenance treatment: findings from a retrospective multi-site study. *J Subst Use* [Internet]. 2016;21(6):601–13. Available from: <http://dx.doi.org/10.3109/14659891.2015.1118564>
8. Saxon AJ, Wells EA, Fleming C, Jackson TR, Calsyn DA. Pre-treatment characteristics, program philosophy and level of ancillary services as predictors of methadone maintenance treatment outcome. *Addiction*. 1996;91(8):1197–209.
9. Scavone JL, Sterling RC, Weinstein SP, Van Bockstaele EJ. Impact of cannabis use during stabilization on methadone maintenance treatment. *Am J Addict*. 2013;(22):344–51.
10. Somers CJ, O'Connor J (2012) Retrospective study of outcomes, for patients admitted to a drug treatment centre board. *Ir. Med. J.* 105:
11. Wasserman DA, Weinstein MG, Havassy BE, Hall SM. Factors associated with lapses to heroin use during methadone maintenance. *Drug Alcohol Depend* [Internet]. 1998;52(3):183–92. Available from: [http://eutils.ncbi.nlm.nih.gov/entrez/eutils/elink.fcgi?dbfrom=pubmed&id=9839144&retmode=ref&cmd=prlinks%5Cnfile:///Articles/1998/Wasserman/Drug Alcohol Depend 1998 Wasserman.pdf](http://eutils.ncbi.nlm.nih.gov/entrez/eutils/elink.fcgi?dbfrom=pubmed&id=9839144&retmode=ref&cmd=prlinks%5Cnfile:///Articles/1998/Wasserman/Drug%20Alcohol%20Depend%201998%20Wasserman.pdf)
12. Zielinski L, Bhatt M, Sanger N, Plater C, Worster A, Varenbut M, et al. Association between cannabis use and methadone maintenance treatment outcomes: an investigation into sex differences. *Biol Sex Differ*. 2017;8(1):1–10.
13. Joe GW, Dwayne Simpson D, Broome KM. Effects of readiness for drug abuse treatment on client retention and assessment of process. *Addiction*. 1998;93(8):1177–90.
14. Peles E, Schreiber S, Adelson M. Factors predicting retention in treatment: 10-year experience of a methadone maintenance treatment (MMT) clinic in Israel. *Drug Alcohol Depend*. 2006;82(3):211–7.
15. Peles E, Linzy S, Kreek MJ, Adelson M. One-year and cumulative retention as predictors of success in methadone maintenance treatment: A comparison of two clinics in the United States and Israel. *J Addict Dis*. 2008;27(4):11–25.
16. Schiff M, Levit S, Moreno RC. Retention and illicit drug use among methadone patients in Israel: A gender comparison. *Addict Behav*. 2007;32(10):2108–19.
17. Weizman T, Gelkopf M, Melamed Y, Adelson M, Bleich A. Cannabis abuse is not a risk factor for treatment outcome in methadone maintenance treatment: a 1-year prospective study in an Israeli clinic. *Australas Psychiatry*. 2004;38:42–6.
18. White WL, Campbell MD, Spencer RD, Hoffman HA, Crissman B, DuPont RL. Patterns of

- Abstinence or Continued Drug Use Among Methadone Maintenance Patients and Their Relation to Treatment Retention. *J Psychoactive Drugs* [Internet]. 2014;46(2):114–22. Available from: <http://dx.doi.org/10.1080/02791072.2014.901587>
19. Bleich AVI, Gelkopf M, Schmidt V, Hayward R, Bodner G, Adelson M. Correlates of benzodiazepine abuse in methadone maintenance treatment . A 1 year prospective study in an Israeli clinic. 1999;94(January).
  20. Peirce JM, Petry NM, Roll JM, Kolodner K, Krasnansky J, Stabile PQ, et al. Correlates of stimulant treatment outcome across treatment modalities. *Am J Drug Alcohol Abuse*. 2009;35(1):48–53.
  21. Saxon AJ, Calsyn DA, Greenberg D, Blaes P, Haver VM, Stanton V. Urine Screening for Marijuana Among Methadone-Maintained Patients. *Am J Addict*. 1993;2(3):207–11.
  22. Strain EC, Brooner RK, Bigelow GE. Clustering of multiple substance use and psychiatric diagnoses in opiate addicts. *Drug Alcohol Depend*. 1991;27(2):127–34.
