# Supplementary material
Source: PubMed Central journal article supplement (PMC7010349)
Supplement: supp_7.4.E665_2019-0026-original-submission.pdf [file supp_7.4.E665_2019-0026-original-submission.pdf]

## **Title: Cannabis is Not an Exit Drug for Patients with Opioid Use Disorder: A Systematic Review and Meta-Analysis**

Heather McBrien HBSc.<sup>1</sup>, Candice Luo BHSc.<sup>2</sup>, Nitika Sanger HBSc.<sup>3</sup>, Laura Zielinsk MSc i<sup>4</sup>, Meha Bhatt MSc<sup>5</sup>, Xi Ming Zhu BSc.<sup>6</sup>, David Marsh MD<sup>7</sup>, Lehana Thabane PhD, MSc<sup>8,9</sup>, Zainab Samaan MBChB, MSc, DMMD, PhD, MRCPsych<sup>9,10\*</sup>

<sup>1</sup>Statistical Sciences Program, University of Toronto, Toronto, Canada.

<sup>2</sup>Michael G. DeGroote School of Medicine, Hamilton, Ontario, 1280 Main Street West, Hamilton, ON L8S 4L8, Canada

<sup>3</sup>Medical Science Graduate Program, McMaster University, 1280 Main Street West, Hamilton, ON L8S 4L8, Canada.

<sup>4</sup>MiNDS Neuroscience Graduate Program, McMaster University, 1280 Main Street West, Hamilton, ON L8S 4L8, Canada.

<sup>5</sup>Health Research Methodology Graduate Program, McMaster University, 1280 Main Street West, Hamilton, ON L8S 4L8, Canada.

<sup>6</sup>St. George's Hospital Medical School, University of London, London, United Kingdom.

<sup>7</sup>Northern Ontario School of Medicine, Ramsay Lake Road, Sudbury, Ontario P3E 6H6, Canada.

<sup>8</sup>Biostatistics Unit, Research Institute at St Joes, St. Joseph's Healthcare Hamilton, 50 Charlton Avenue E., Hamilton, ON L8N 4A6, Canada.

<sup>9</sup>Department of Health Research Methods, Evaluation, and Impact, McMaster University, Hamilton, Canada

<sup>10</sup>Department of Psychiatry and Behavioural Neurosciences, McMaster University, 1280 Main Street West, Hamilton, ON L8S 4L8, Canada.

### **\*Corresponding author:**

Dr. Zainab Samaan, MBChB, DMMD, MSc, MRCPsych, PhD  
Mood Disorders Program, St. Joseph's Healthcare Hamilton  
100 West 5<sup>th</sup> St., Hamilton, ON, L8N 3K7  
Telephone: 905 522 1155 ext. 36372, Fax: 905 575 6029

### **Funding**

This work was funded by the Canadian Institute for Health Research catalyst grant investigating cannabis use on opioid addiction, Grant #155404

### **Declaration of Interest**

The authors declare that they have no competing interests.

**Abstract:**

*Introduction:* Opioid use disorder (OUD) is a fundamental component of the ongoing opioid epidemic. Although methadone maintenance therapy (MMT) is the most common treatment used for OUD, its effectiveness is inconsistent. Rates of cannabis use among patients on MMT are high, and cannabis may be associated with MMT outcomes. This review examined the effect of cannabis on continued opioid use of patients on MMT to test the hypothesis that cannabis use is associated with reduction in opioid use.

*Methods:* We searched Medline/PubMed, EMBASE, PsycINFO, and CINAHL from inception to July 2018. We summarized the effects of cannabis use on illicit opioid use during MMT and treatment retention and poly-substance use. We conducted meta-analyses of those primary outcomes using a random effects model.

*Results:* We included 23 studies in our review. Six studies with a total number of participants of 3676 were meta-analyzed examining cannabis and illicit opioid use during MMT. The results showed that cannabis use did not reduce opioid use during MMT (OR 0.39, 95% CI 0.09, 1.79,  $p=0.23$ ). Cannabis use did not affect retention. The overall quality of evidence was very low, with a high risk of bias, due to the nature of observational studies.

*Interpretation:* There is no evidence to suggest that cannabis helps patients with OUD stop using opioids. Despite the included studies methodological limitations, this evidence is generated using a large sample and rigorous systematic review methods providing the best and most up-to-date data on the association between cannabis and opioid use.

*PROSPERO Registration:* CRD42015029372

## Introduction:

The current epidemic of opioid use and overdose deaths, with roots in the 1990s and 2000s, when the use of prescription opioids for chronic pain began to increase (1–4), has since escalated so far that the number of yearly opioid-related deaths in Ontario has tripled since 2000 (5). There were 3987 opioid related deaths in Canada in 2017, and fentanyl and its analogues were involved in 72% those deaths (5).

Opioid use disorder (OUD) is a fundamental component of this crisis (6,7). Despite its stark morbidity and mortality, the high rates of HIV and Hepatitis C infection among patients with OUD, high unemployment rates, and death rates – treatment options are limited in scope and effectiveness (8,9). Methadone maintenance therapy (MMT) is commonly used for OUD (10,11), whereas other opioid substitutions treatments have gained ground more recently (12). Despite its reported benefits in managing OUD, the number of patients on MMT who continue to use illicit opioids is relatively high at 52% (13). It has been suggested that cannabis use may reduce opioid use in other settings such as pain management, however there is no evidence to support cannabis use in OUD treatment.

The rates of cannabis use among patients on MMT are far higher than those in the general population: about a third of Canadians have used cannabis once in their lifetime (14), but 59.7 of males and 43.5% of females reported using cannabis while receiving MMT (15–17).

Recent studies have found that in states in the USA with dispensary-based medical cannabis laws, fewer prescription opioids are dispensed (18), and that these states have lower opioid overdose death rates (19).

In the wake of these studies, some high-profile organizations have suggested that cannabis should be legalized not only as a mechanism to lower prescription use, but as a method for coping with opioid withdrawal symptoms (20). These changes made news headlines labeling cannabis as an “exit drug”(20).

However, the ‘exit hypothesis’ has not been examined scientifically. With the rapid expansion of medical cannabis dispensaries around Canada and the impending legalization of cannabis, this question has never been more relevant.

We examine the relationship between cannabis and opioid use during MMT. We ask, 1) does the exit hypothesis hold in patients with opioid use disorder? 2) does cannabis use improve treatment retention in OUD? and 3) does cannabis use in this population reduce the risk of other drugs use?

## Methods:

This review is presented in accordance with the Preferred Reporting Items for Systematic Reviews and Meta-Analyses (PRISMA) guidelines (21), and it has been registered with PROSPERO (No. CRD42015029372). The detailed methods have been published in a protocol in *Systematic Reviews* (16).

We searched MEDLINE/PubMed, EMBASE, PsychINFO, and CINAHL from inception to July 2018 for relevant studies, and we also searched grey literature using the ProQuest Theses and Dissertations Global database. We applied no language or demographic restrictions.

We included studies that looked at the association between cannabis and outcomes of methadone maintenance therapy. To meet our inclusion criteria, a study had to measure outcomes of MMT by measuring participants’ illicit opioid use during the treatment, or by

1  
2  
3 treatment retention rates by cannabis use. We excluded studies where the sample included  
4 patients on other opioid substitution therapies such as buprenorphine and the study did not  
5 perform separate analyses on methadone receiving patients only. We included only methadone  
6 treatment because it was the most commonly used treatment and to avoid heterogeneity by  
7 including different treatment interventions. There were no other exclusion criteria.

8  
9 We screened all articles in duplicate at all stages and performed data extraction in  
10 duplicate. We measured inter-rater agreement with the kappa statistic calculation, and we  
11 assessed risk of bias for each included study in duplicate using the modified Newcastle-Ottawa  
12 Scale (NOS) (22). We measured the overall quality of the evidence using the Grading of  
13 Recommendations, Assessment, Development, and Evaluation (GRADE) framework (23).

14  
15 We performed meta-analyses, using random effects models. The first analysis included  
16 studies that measured outcomes of MMT by measuring the association between cannabis use and  
17 illicit opioid by patients on methadone therapy. The other meta analyses included studies that  
18 assessed the association between cannabis use and methadone treatment retention and subgroup  
19 analyses to explain heterogeneity. A study was considered for inclusion in the meta analyses if it  
20 produced, or included enough information to generate an odds ratio, which was then calculated  
21 using RevMan version 5.3 software (22). If a study included multiple points of measurement for  
22 cannabis use, we used the baseline measurement. Some studies measured cannabis use both prior  
23 to treatment and during treatment, and we chose to use the in-treatment cannabis measurement.  
24 In studies that included multiple follow-up points for the outcome measurement, we included the  
25 latest follow-up time point in the meta-analysis.

26  
27 We performed a sensitivity analysis by excluding all studies with NOS scores of 0 and 1  
28 and redoing both meta-analyses. We also performed subgroup analyses, but we were unable to  
29 do all of those planned in the published protocol because some of the studies didn't contain the  
30 necessary information.

## 31 32 33 **Results:**

34  
35 Of the 2,467 unique citations screened, 23 studies were included. Inter-rater agreement  
36 was acceptable for both title/abstract,  $\kappa=0.63$  (95% CI: 0.57-0.69) and full text screening,  $\kappa$   
37 =0.60 (95% CI: 0.45-0.74). Although we did not apply any age restrictions, all studies were of an  
38 adult population. In studies that reported the proportion of participants with any recent or current  
39 (i.e. not lifetime measurements) cannabis use, the prevalence varied from 11.2% to 78.6%. All of  
40 the studies we included has a moderate or high risk of bias on at least one NOS criterion.  
41 Detailed study characteristics are summarized in Table 1, along with NOS ratings in Table 2.

## 42 43 44 45 **Illicit Opioid Use as an Outcome:**

46  
47 Twelve studies examined the relationship between cannabis use and illicit opioid use or  
48 opioid relapse (15,24–34). Of those, the vast majority showed no significant association (see  
49 Table 1A).

50  
51 The meta-analysis of the effect of cannabis use on illicit opioid use included six studies  
52 and did not show a significant effect (OR=0.39, 95% CI=0.09-1.79,  $p = 0.23$ ), and there was  
53 significant heterogeneity in the studies included with an  $I^2$  of 96%, [ $\chi^2(6)=141.54$ ,  $p<0.00001$ ].  
54 These results didn't change when we excluded studies with a high risk of bias. We conducted  
55 subgroup analyses by country and method of cannabis use measure (i.e. objective vs. patient  
56  
57  
58  
59  
60

1  
2  
3 reported or subjective), and all the results showed no effect of cannabis on opioid use (Figure 2 B  
4 and C).

5 The overall quality of evidence (as assessed using GRADE) was very low, with critical  
6 issues of inconsistency and imprecision, in addition to having a moderate risk of bias. Due to the  
7 nature of the observational study designs, GRADE ratings of quality start from low and any  
8 additional concern in quality assessment will make the quality very low. There was no evidence  
9 of publication bias.  
10  
11

### 12 **Treatment Retention as an Outcome:**

13  
14  
15 Eleven studies investigated the influence of cannabis use on methadone  
16 maintenance treatment retention (27,28,30,33–40). The majority (eight) of the studies found no  
17 significant association between cannabis use and treatment retention (Table 1B).  
18 The pooled analysis showed no significant effect of cannabis use on treatment retention  
19 (OR=0.48, 95% CI=0.18,1.28,  $p = 0.14$ ). The analysis had significant heterogeneity, with an  $I^2$  of  
20 90%, [ $\chi^2(4)=41.62, p<.0001$ ]. The sensitivity analysis conducted by excluding studies with high  
21 risk of bias did not change the result. In the subgroup analysis results by country, we found  
22 studies conducted in USA showed cannabis use to be significantly associated with decreased  
23 retention rates, OR=0.23, 95% CI=0.13, 0.39,  $p < .0001$ , while those conducted in Israel showed  
24 the opposite direction, OR=1.48, 95% CI=1.20,1.82,  $p < .0001$  (Figure 4B). Both subgroup  
25 analyses had an  $I^2$  value of 0%, indicating no heterogeneity.  
26

27 The overall quality of evidence was very low, with quality issues related to inconsistency  
28 and imprecision. The funnel plot presented in Figure 5 displays slight asymmetry, however this  
29 is unlikely to be related to publication bias, as most studies included in the review had non-  
30 significant results.  
31  
32

### 33 **Secondary Outcome Measures:**

34  
35 We also reviewed the literature looking for associations between cannabis use and several  
36 secondary outcomes – polydrug use, criminal activity, and HIV and HCV risk behaviours. The  
37 evidence in all of these areas is inconclusive. Please see Table 1C, Table 1D, and Table 1E  
38 (24,27,45,31,33,34,40–44).  
39  
40

### 41 **Discussion:**

42  
43 We included 23 studies that examined the association between cannabis use and opioid  
44 use and retention in MMT. The meta-analysis of six of these studies showed no effect of  
45 cannabis on opioid use. Of the 11 studies on the relationship between cannabis use and  
46 methadone treatment retention, our pooled meta-analysis of four of these studies showed no  
47 significant effect. All meta-analyses had substantial heterogeneity, and the overall quality of  
48 evidence was very low, with high risk of bias due to the nature of observational studies.  
49

50 To our knowledge, this is the first systematic review and meta analyses investigating the  
51 use of cannabis during MMT. The results suggest that cannabis has no effect on opioid use in  
52 patients on MMT. However, the limitations of this study mean that a true effect of cannabis on  
53 opioid use during MMT could have been missed, because of the following limitations.  
54  
55  
56  
57  
58  
59  
60

1  
2  
3 First, these results come from small to medium sized observational studies with limited  
4 data on confounding variables. For example, cannabis is seldom used alone; it's associated with  
5 polydrug use, and with comorbid substance use disorders in MMT patients (40,46,47). Both  
6 polydrug use and substance use disorders are associated with poorer treatment outcomes in OUD  
7 themselves (48).  
8

9 There were also methodological limitations. Our meta-analyses had substantial  
10 heterogeneity, partly because of variability in methodology between studies: there were  
11 differences in the delivery and duration of MMT, the definition of cannabis use, and measures of  
12 treatment outcomes. Our predefined subgroup analyses based on region and how cannabis use  
13 was measured did not explain this heterogeneity. The limited number of studies included in the  
14 meta-analyses precluded us from conducting further subgroup analyses to identify possible  
15 sources of heterogeneity.  
16

17 In addition, many of the included studies dichotomized cannabis use in some way,  
18 splitting people who used some cannabis from those who used none at all, or splitting those who  
19 used more than a certain threshold amount of cannabis from those who used less. This choice  
20 was likely made because dosage of cannabis is challenging to quantify (49), but it makes the  
21 establishment of a dose-response relationship in any of these studies impossible. It also reduces  
22 the sensitivity of any findings. This choice could obscure a significant association, especially  
23 considering many of the other health effects of cannabis are only visible with heavy usage  
24 (50,51). Although we recognize that it may be difficult, further research should use more  
25 sensitive and detailed definitions of cannabis use.  
26

27 Furthermore, the studies didn't distinguish between cannabis use disorder and  
28 recreational cannabis use. Patients with cannabis use disorder (CUD) have high rates of  
29 comorbid psychiatric and personality disorders compared to recreational users (52), which are  
30 associated with poorer treatment outcomes (53). Some studies suggest cannabis use disorder is  
31 associated with less other drug use during MMT, whereas recreational cannabis use is associated  
32 with more (54). Again, polydrug use is associated with poorer outcomes, therefore grouping all  
33 cannabis users together makes the interpretation challenging.  
34

35 We need more research to understand the complex relationships between opioid use,  
36 OUD treatment outcomes, cannabis use, and other drug use. However, one thing is very clear:  
37 there is no evidence to support the use of cannabis as an exit drug. The broad negative health  
38 effects of heavy cannabis use have also been well documented in the literature (50,51). We  
39 should continue to counsel patients on the potential risks of cannabis use, while emphasizing that  
40 we have no evidence to support the use of cannabis to stop opioid use.  
41

42 Previous studies reported that in states with dispensary-based medical cannabis laws,  
43 fewer prescription opioids were dispensed (18,19). We note that those results do not show that  
44 this reduction was because cannabis was used as a replacement for opioids. More recently, a  
45 national cohort study investigating cannabis use in patients prescribed opioids for chronic non-  
46 cancer pain showed that cannabis use did not reduce opioid use or help with opioid  
47 discontinuation. Using cannabis was associated with worse pain control and psychiatric  
48 symptoms (55). This study supports our findings in a wider population. More investigation is  
49 needed to reconcile the findings of the policy-related studies with those of the patient  
50 populations.  
51

52 We conclude based on the current study that cannabis use is not associated with reduced  
53 opioid use. Caution must be exercised when evaluating data related to cannabis and opioid use,  
54 in order to avoid advocating for cannabis use in the absence of a credible evidence.  
55  
56  
57  
58  
59  
60



## References:

1. Hall AJ, Logan JE, Toblin RL, Kaplan JA, Kraner JC, Bixler D, et al. Patterns of Abuse Among Unintentional Pharmaceutical Overdose Fatalities. *JAMA* [Internet]. 2008;300(22):2613–9. Available from: [www.jama.com](http://www.jama.com)
2. Dunn KM, Saunders KW, Rutter CM, Banta-Green CJ, Merrill JO, Sullivan MD, et al. Opioid Prescriptions for Chronic Pain and Overdose A Cohort Study. *Ann Intern Med* [Internet]. 2010;152:85–92. Available from: [www.annals.org](http://www.annals.org)
3. Paulozzi LJ, Ryan GW. Opioid Analgesics and Rates of Fatal Drug Poisoning in the United States. *Am J Prev Med*. 2006;31(6):506–11.
4. Centers for Disease Control and Prevention Morbidity and Mortality Weekly Report. 2010.
5. National report: Apparent opioid-related deaths in Canada [Internet]. 2018. Available from: <https://www.canada.ca/en/public-health/services/publications/healthy-living/national-report-apparent-opioid-related-deaths-released-march-2018.html>
6. Kolodny A, Courtwright DT, Hwang CS, Kreiner P, Eadie JL, Clark TW, et al. The Prescription Opioid and Heroin Crisis: A Public Health Approach to an Epidemic of Addiction. *Annu Rev Public Health*. 2015;36:559–74.
7. Han B, Compton WM, Jones CM, Cai R. Nonmedical prescription opioid use and use disorders among adults aged 18 through 64 years in the United States, 2003-2013. *JAMA - J Am Med Assoc*. 2015;314(14):1468–78.
8. Connery HS. Medication-assisted treatment of opioid use disorder: Review of the evidence and future directions. *Harvard Review of Psychiatry*. 2015. p. 63–75.
9. Socias ME, Ahamad K. An urgent call to increase access to evidence-based opioid agonist therapy for prescription opioid use disorders. *Can Med Assoc J*. 2016;(188):17–8.
10. Farré M, Mas A, Torrens M, Moreno V, Camí J. Retention rate and illicit opioid use during methadone maintenance interventions: A meta-analysis. *Drug Alcohol Depend*. 2002;(65):283–90.
11. MacArthur GJ, Minozzi S, Martin N, Vickerman P, Deren S, Bruneau J, et al. Opiate substitution treatment and HIV transmission in people who inject drugs: systematic review and meta-analysis. *BMJ*. 2012;345(5945).
12. Bruneau J, Ahamad K, Goyer M-È, Poulin G, Selby P, Fischer B, et al. Management of opioid use disorders: a national clinical practice guideline. *Can Med Assoc J* [Internet]. 2018;190(9):E247–57. Available from: <http://www.cmaj.ca/lookup/doi/10.1503/cmaj.170958>
13. Shahid, H, Bhatt Meha, Sanger, Nitika, Zielinski, Laura, Luo, Candice, Bantoto, Bianca, Shams, Ieta, Mouravska, Natalia, Lue Tam, Sabrina, Hudson, Jackie, Thabane, Lehana, Samaan Z. Association Between Family Factors and Illicit Polysubstance Use Amongst Methadone Maintenance Patients with Opioid Use Disorder. *Int J High Risk Behav Addict*. 2018;7(3).
14. Scavone JL, Sterling RC, Weinstein SP, Van Bockstaele EJ. Impact of cannabis use during stabilization on methadone maintenance treatment. *Am J Addict*. 2013;(22):344–51.
15. Zielinski L, Bhatt M, Sanger N, Plater C, Worster A, Varenbut M, et al. Association between cannabis use and methadone maintenance treatment outcomes: an investigation into sex differences. *Biol Sex Differ*. 2017;8(1):1–10.

16. Zielinski L, Bhatt M, Eisen RB, Perera S, Bhatnagar N, MacKillop J, et al. Association between cannabis use and treatment outcomes in patients receiving methadone maintenance treatment: A systematic review protocol. *Syst Rev*. 2016;5(139).
17. Timko C, Schultz NR, Cucciare MA, Vittorio L, Garrison-Diehn C. Retention in medication-assisted treatment for opiate dependence: A systematic review. *J Addict Dis*. 2016;35(1):22–35.
18. Bradford AC, Bradford WD, Abraham A, Adams GB. Association between US state medical cannabis laws and opioid prescribing in the medicare part D population. *JAMA Intern Med*. 2018;178(5):667–73.
19. Bachhuber MA, Saloner B, Cunningham CO, Barry CL. Medical cannabis laws and opioid analgesic overdose mortality in the United States, 1999-2010. *JAMA Intern Med*. 2014;174(10):1668–73.
20. Veterans Affairs Medical Marijuana Policy [Internet]. 2017. Available from: [https://www.scribd.com/document/367496398/Veterans-Affairs-Medical-Marijuana-Policy#from\\_embed](https://www.scribd.com/document/367496398/Veterans-Affairs-Medical-Marijuana-Policy#from_embed)
21. Moher D, Liberati A, Tetzlaff J, Altman DG. Guidelines and Guidance Preferred Reporting Items for Systematic Reviews and Meta-Analyses: The PRISMA Statement. *Plos Med* [Internet]. 2009;6(7). Available from: <http://www.prisma-statement>.
22. Review Manager (RevMan) [Computer program]. Version 5.3. Copenhagen: The Nordic Cochrane Centre, The Cochrane Collaboration, 2014
23. Guyatt GH, Oxman AD, Schünemann HJ, Tugwell P, Knottnerus A. GRADE guidelines: A new series of articles in the Journal of Clinical Epidemiology. *J Clin Epidemiol*. 2011;64(4):380–2.
24. Best D, Gossop M, Greenwood J, Marsden J, Lehmann P, Strang J. Cannabis use in relation to illicit drug use and health problems among opiate misusers in treatment. *Drug Alcohol Rev*. 1999;18(January 1998):31–8.
25. Wasserman DA, Weinstein MG, Havassy BE, Hall SM. Factors associated with lapses to heroin use during methadone maintenance. *Drug Alcohol Depend* [Internet]. 1998;52(3):183–92. Available from: [http://eutils.ncbi.nlm.nih.gov/entrez/eutils/elink.fcgi?dbfrom=pubmed&id=9839144&retmode=ref&cmd=prlinks%5Cnfile:///Articles/1998/Wasserman/Drug Alcohol Depend 1998 Wasserman.pdf](http://eutils.ncbi.nlm.nih.gov/entrez/eutils/elink.fcgi?dbfrom=pubmed&id=9839144&retmode=ref&cmd=prlinks%5Cnfile:///Articles/1998/Wasserman/Drug%20Alcohol%20Depend%201998/Wasserman.pdf)
26. Somers CJ, O'Connor J. Retrospective study of outcomes, for patients admitted to a drug treatment centre board. *Irish Medical Journal (IMJ)*. 2012 Oct 1.
27. Epstein DH, Preston KL. Does cannabis use predict poor outcome for heroin-dependent patients on maintenance treatment? Past findings and more evidence against. *Addiction*. 2003;98(3):269–79.
28. Levine AR, Lundahl LH, Ledgerwood DM, Lisieski M, Rhodes GL, Greenwald MK. Gender-Specific Predictors of Retention and Opioid Abstinence During Methadone Maintenance Treatment. *J Subst Abuse Treat* [Internet]. 2015;54:37–43. Available from: <http://dx.doi.org/10.1016/j.jsat.2015.01.009>
29. Lions C, Carrieri MP, Michel L, Mora M, Marcellin F, Morel A, et al. Predictors of non-prescribed opioid use after one year of methadone treatment: An attributable-risk approach (ANRS-Methaville trial). *Drug Alcohol Depend* [Internet]. 2014;135(1):1–8. Available from: <http://dx.doi.org/10.1016/j.drugalcdep.2013.10.018>
30. Nava F, Manzato E, Lucchini A. Chronic cannabis use does not affect the normalization



- of hypothalamic-pituitary-adrenal (HPA) axis induced by methadone in heroin addicts. *Prog Neuro-Psychopharmacology Biol Psychiatry*. 2007;31(5):1089–94.
31. Nirenberg TD, Cellucci T, Liepman MR, Swift RM, Sirota AID. Cannabis versus other illicit drug use among methadone maintenance patients. Vol. 10, *Psychology of addictive behaviours*. 1996. p. 222–7.
  32. Proctor SL, Copeland AL, Kopak AM, Hoffmann NG, Herschman PL, Polukhina N. Outcome predictors for patients receiving methadone maintenance treatment: findings from a retrospective multi-site study. *J Subst Use [Internet]*. 2016;21(6):601–13. Available from: <http://dx.doi.org/10.3109/14659891.2015.1118564>
  33. Saxon AJ, Calsyn DA, Greenberg D, Blaes P, Haver VM, Stanton V. Urine Screening for Marijuana Among Methadone-Maintained Patients. *Am J Addict*. 1993;2(3):207–11.
  34. Scavone JL, Sterling RC, Van Bockstaele EJ. Cannabinoid and opioid interactions: Implications for opiate dependence and withdrawal. *Neuroscience [Internet]*. 2013;248:637–54. Available from: <http://dx.doi.org/10.1016/j.neuroscience.2013.04.034>
  35. White WL, Campbell MD, Spencer RD, Hoffman HA, Crissman B, DuPont RL. Patterns of Abstinence or Continued Drug Use Among Methadone Maintenance Patients and Their Relation to Treatment Retention. *J Psychoactive Drugs [Internet]*. 2014;46(2):114–22. Available from: <http://dx.doi.org/10.1080/02791072.2014.901587>
  36. Joe GW, Dwayne Simpson D, Broome KM. Effects of readiness for drug abuse treatment on client retention and assessment of process. *Addiction*. 1998;93(8):1177–90.
  37. Peles E, Schreiber S, Adelson M. Factors predicting retention in treatment: 10-year experience of a methadone maintenance treatment (MMT) clinic in Israel. *Drug Alcohol Depend*. 2006;82(3):211–7.
  38. Peles E, Linzy S, Kreek MJ, Adelson M. One-year and cumulative retention as predictors of success in methadone maintenance treatment: A comparison of two clinics in the United States and Israel. *J Addict Dis*. 2008;27(4):11–25.
  39. Schiff M, Levit S, Moreno RC. Retention and illicit drug use among methadone patients in Israel: A gender comparison. *Addict Behav*. 2007;32(10):2108–19.
  40. Weizman T, Gelkopf M, Melamed Y, Adelson M, Bleich A. Cannabis abuse is not a risk factor for treatment outcome in methadone maintenance treatment: a 1-year prospective study in an Israeli clinic. *Australas Psychiatry*. 2004;38:42–6.
  41. Bleich AVI, Gelkopf M, Schmidt V, Hayward R, Bodner G, Adelson M. Correlates of benzodiazepine abuse in methadone maintenance treatment . A 1 year prospective study in an Israeli clinic. 1999;94(January).
  42. Peirce JM, Petry NM, Roll JM, Kolodner K, Krasnansky J, Stabile PQ, et al. Correlates of stimulant treatment outcome across treatment modalities. *Am J Drug Alcohol Abuse*. 2009;35(1):48–53.
  43. Saxon AJ, Wells EA, Fleming C, Jackson TR, Calsyn DA. Pre-treatment characteristics, program philosophy and level of ancillary services as predictors of methadone maintenance treatment outcome. *Addiction*. 1996;91(8):1197–209.
  44. Strain EC, Brooner RK, Bigelow GE. Clustering of multiple substance use and psychiatric diagnoses in opiate addicts. *Drug Alcohol Depend*. 1991;27(2):127–34.
  45. Bell, J, Mattick, R, Hay, A, Chan, J, Hall W. Methadone Maintenance and Drug-Related Crime. *J Subst Abuse*. 1997;9:15–25.
  46. Degenhardt L, Hall W, Lynskey M. The relationship between cannabis use and other substance use in the general population. *Drug Alcohol Depend*. 2001;64:319–27.

- 1
- 2
- 3
- 4 47. Krajicek S. Cannabis Use and Risk of Psychiatric Disorders. *JAMA Psychiatry*. 2016;73:388–95.
- 5
- 6 48. Kelly SM, O’Grady KE, Mitchell SG, Brown BS, Schwartz RP. Predictors of methadone
- 7 treatment retention from a multi-site study: A survival analysis. *Drug Alcohol Depend*.
- 8 2011;117:170–5.
- 9 49. Peggy van der Pol, Nienke Liebrechts, Ron de Graaf, Dirk J. Korf, Wim van den Brink M
- 10 van L. Validation of self-reported cannabis dose and potency: an ecological study.
- 11 *Addiction*. 2013;108:1801–1808.
- 12 50. Volkow ND, Baler RD, Compton WM, Weiss SRB. Adverse Health Effects of Marijuana
- 13 Use. *N Engl J Med*. 2014;370(23):2219–27.
- 14 51. Volkow ND, Swanson JM, Evins AE, DeLisi LE, Meier MH, Gonzalez R, et al. Effects of
- 15 cannabis use on human behavior, including cognition, motivation, and psychosis: A
- 16 review. *JAMA Psychiatry*. 2016;73(3).
- 17 52. Khan SS, Secades-Villa R, Okuda M, Wang S, Pérez-Fuentes G, Kerridge BT, et al.
- 18 Gender differences in cannabis use disorders: Results from the National Epidemiologic
- 19 Survey of Alcohol and Related Conditions. *Drug Alcohol Depend*. 2013;130:101–8.
- 20 53. Rosic T, Naji L, Bawor M, Dennis BB, Plater C, Marsh DC, et al. The impact of comorbid
- 21 psychiatric disorders on methadone maintenance treatment in opioid use disorder: A
- 22 prospective cohort study. *Neuropsychiatr Dis Treat*. 2017;
- 23 54. Peirce JM, Petry NM, Roll JM, Kolodner K, Krasnansky J, Stabile PQ, et al. Correlates of
- 24 Stimulant Treatment Outcome Across Treatment Modalities. *Alcohol Drug Depend*.
- 25 2009;35:49–53.
- 26 55. Campbell G, Hall WD, Peacock A, Lintzeris N, Bruno R, Larance B, et al. Effect of
- 27 cannabis use in people with chronic non-cancer pain prescribed opioids: findings from a
- 28 4-year prospective cohort study. *Lancet Public Heal* [Internet]. 2018;3(7):e341–50.
- 29 Available from: [https://www.thelancet.com/journals/lanpub/article/PIIS2468-](https://www.thelancet.com/journals/lanpub/article/PIIS2468-2667(18)30110-5/fulltext)
- 30 [2667\(18\)30110-5/fulltext](https://www.thelancet.com/journals/lanpub/article/PIIS2468-2667(18)30110-5/fulltext)
- 31
- 32
- 33
- 34
- 35
- 36
- 37
- 38
- 39
- 40
- 41
- 42
- 43
- 44
- 45
- 46
- 47
- 48
- 49
- 50
- 51
- 52
- 53
- 54
- 55
- 56
- 57
- 58
- 59
- 60

1  
2  
3 **Figure 1.** PRISMA flow diagram of included studies  
4  
5  
6  
7

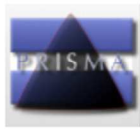

8 **PRISMA 2009 Flow Diagram**  
9

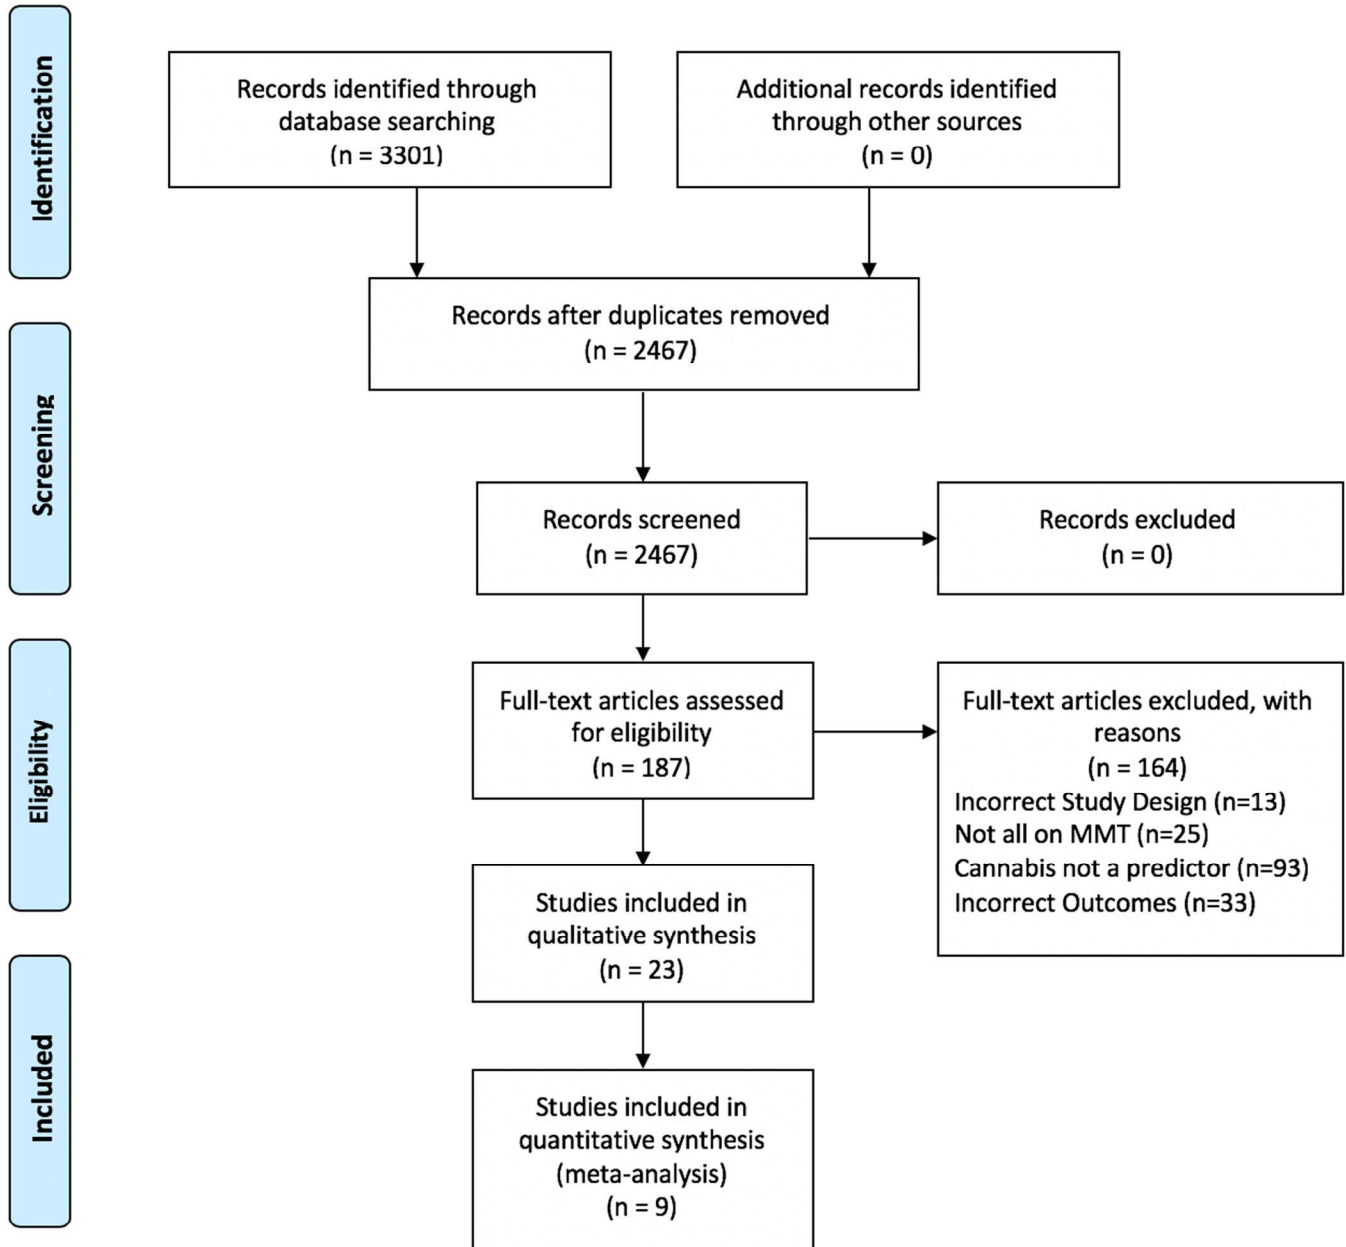

**Figure 2.** Illicit opioid use during treatment by cannabis use meta-analysis**A.** Meta-analysis forest plot for illicit opioid use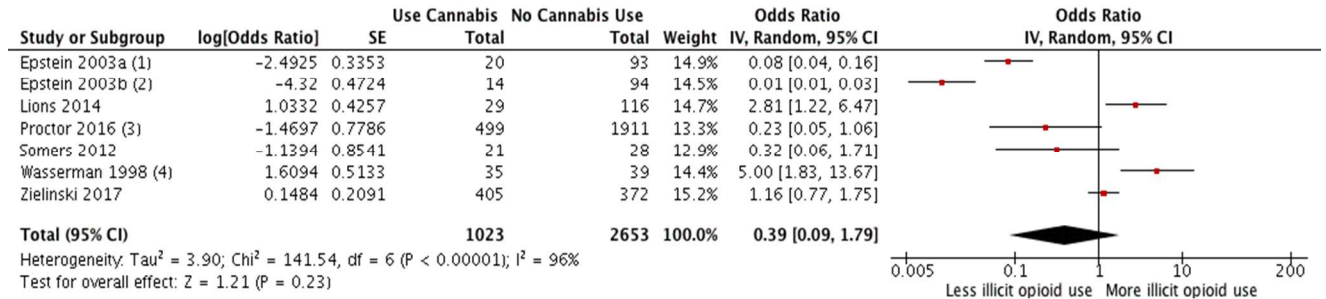**Footnotes**

(1) Combined results of two trials which were 8 weeks long

(2) Results from one trial that was 12 weeks long

(3) Prevalence reflects 12-month cannabis use, as baseline prevalence was not reported. Odds ratio reflects baseline cannabis use and 12-month opioid use.

(4) Odds ratio as estimated in Epstein 2003

**B.** Subgroup meta-analysis stratified by measure of cannabis use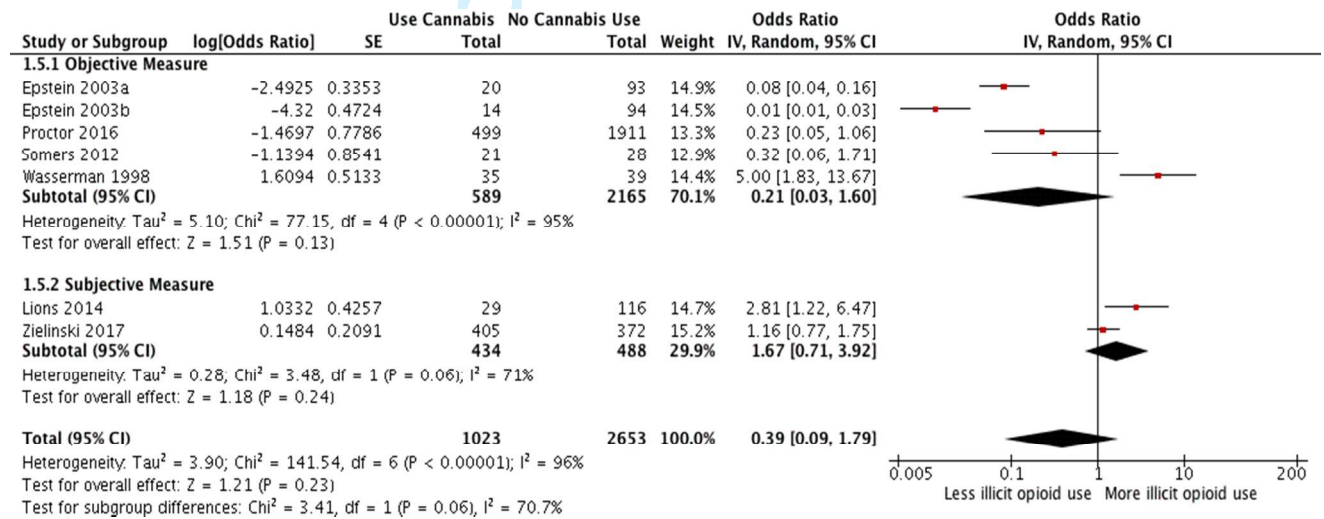**C.** Subgroup meta-analysis stratified by region

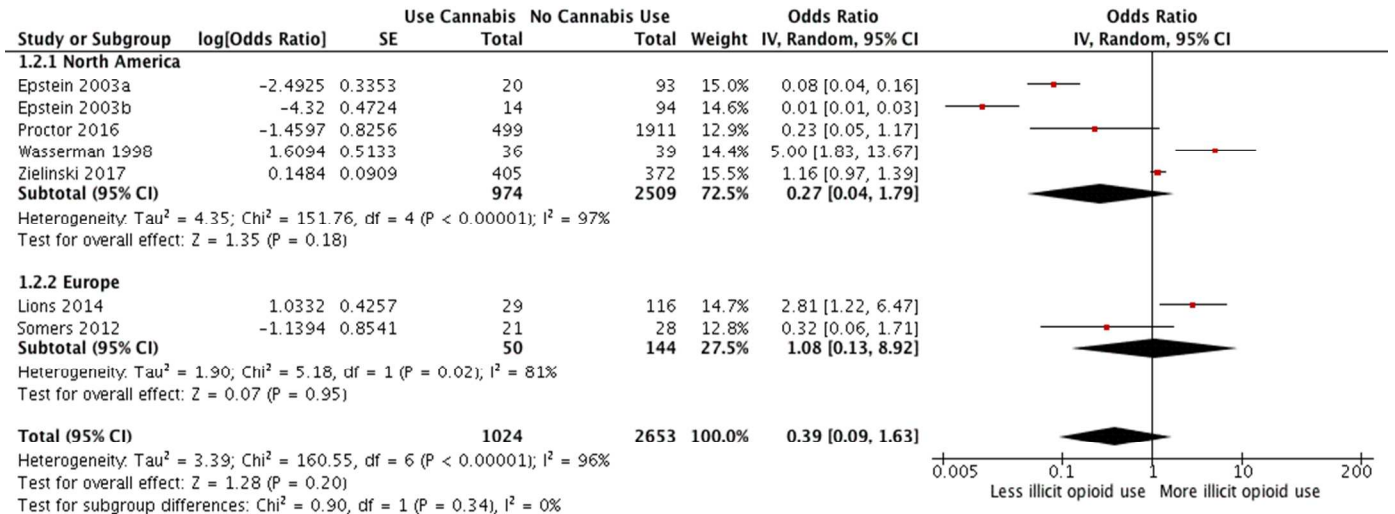

Figure 3. Funnel plot evaluating publication bias for illicit opioid use

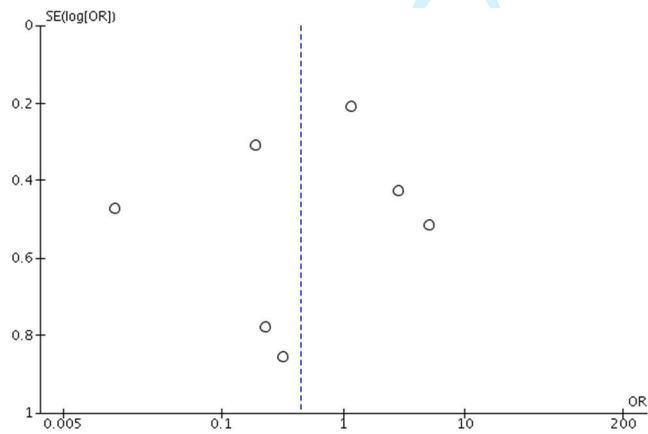



## Figure 4. Treatment retention meta-analysis

### A. Meta-analysis forest plot for treatment retention

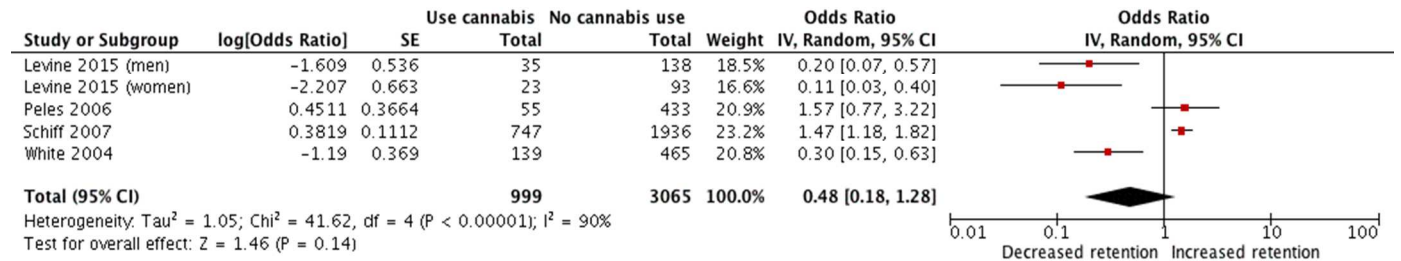

### B. Subgroup meta-analysis stratified by country

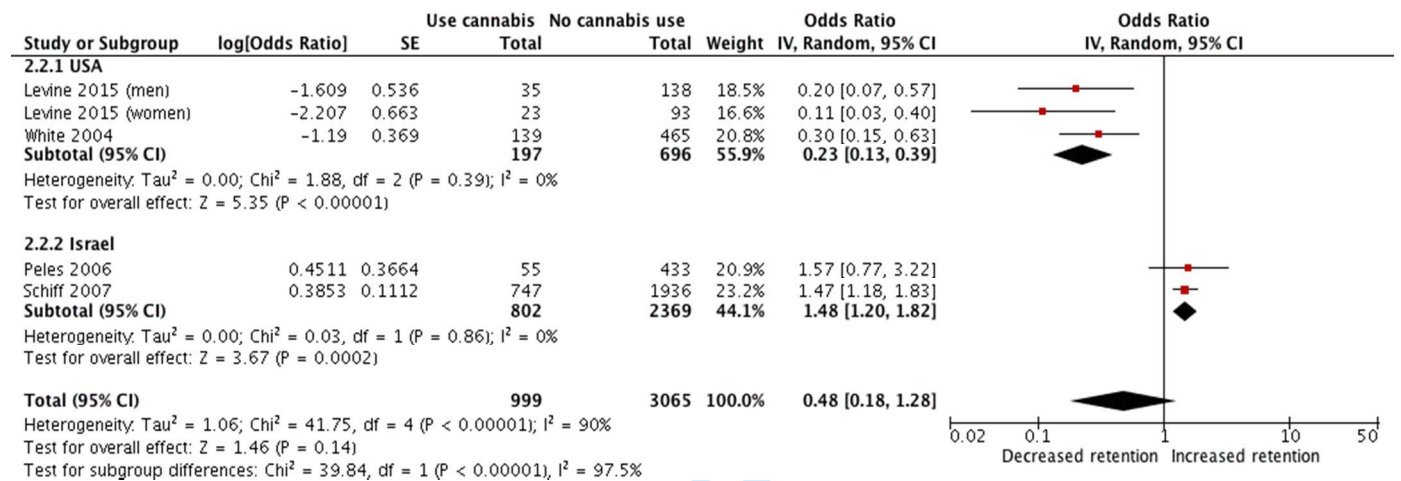

1  
2  
3 **Figure 5.** Funnel plot evaluating publication bias for treatment retention.  
4

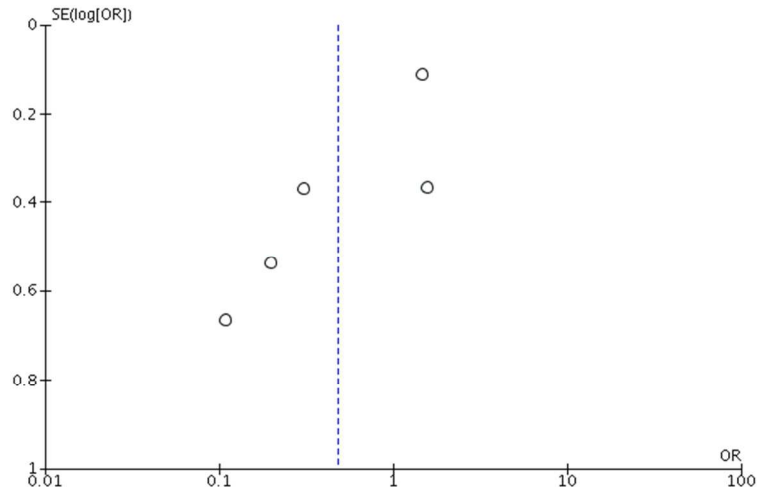

21  
22  
23  
24  
25  
26  
27  
28  
29  
30  
31  
32  
33  
34  
35  
36  
37  
38  
39  
40  
41  
42  
43  
44  
45  
46  
47  
48  
49  
50  
51  
52  
53  
54  
55  
56  
57  
58  
59  
60

Confidential

**Table 1. Individual Study Characteristics by Outcomes****A. Illicit Opioid Use**

| Study             | Country | Study Design                                            | Sample Size (% Female) | Cannabis Use Definition                                                                                                                                                                 | Outcome                                                                                                                                                                                  | Statistical Analysis               | Results                                                                                                                                                                                                                                                                                                                        |
|-------------------|---------|---------------------------------------------------------|------------------------|-----------------------------------------------------------------------------------------------------------------------------------------------------------------------------------------|------------------------------------------------------------------------------------------------------------------------------------------------------------------------------------------|------------------------------------|--------------------------------------------------------------------------------------------------------------------------------------------------------------------------------------------------------------------------------------------------------------------------------------------------------------------------------|
| Best, 1999 (1)    | UK      | Cross sectional                                         | 200 (30%)              | <b>Method:</b> MAP<br><b>Definition:</b> Categorical; daily users, occasional users (used cannabis but not on all 30 days in previous months), and non-users<br><b>Timing:</b> Baseline | <b>Method:</b> MAP<br><b>Definition:</b> Continuous; Mean number of days of heroin use in the past 30 days from MAP<br><b>Timing:</b> Baseline                                           | ANOVA; post-hoc Scheffe test       | F=11.07, p<.0001, such that non-users had more occasions of heroin use than occasional and daily users                                                                                                                                                                                                                         |
| Epstein, 2003 (2) | USA     | Secondary RCT analysis (3 separate analyses), 12 months | 408 (40.44%)           | <b>Method:</b> Diagnostic Interview and urinalysis<br><b>Definition:</b> Dichotomized cannabis use and cannabis abuse/dependence diagnosis<br><b>Timing:</b> Baseline and 12 months     | <b>Method:</b> Urinalysis<br><b>Definition:</b> Relapse to heroin among patients who achieved abstinence (3 consecutive weeks of opioid abstinence)<br><b>Timing:</b> Time to lapse      | Cox proportional-hazard regression | <b>Cannabis use:</b><br>First two trials: HR = 1.54 (0.93–2.56) ; $\chi^2=2.78$ , p=0.095<br>Third trial: HR = 0.90 (0.48-1.65) ; $\chi^2=0.13$ , p=0.72<br><b>Cannabis abuse/dependence:</b><br>First two trials: HR = 1.16 (0.63–2.13); $\chi^2=0.22$ , p=0.64<br>Third trial: HR = 2.09 (0.76-5.76); $\chi^2=1.66$ , p=0.19 |
| Levine, 2015 (3)  | USA     | Retrospective cohort, 1 year                            | 290 (40.34%)           | <b>Method:</b> Urinalysis<br><b>Definition:</b> Dichotomized cannabis use<br><b>Timing:</b> Baseline within the First month of drug testing upon entry into MMT                         | <b>Method:</b> Urinalysis<br><b>Definition:</b> Continuous; Proportion of UDS results negative for opioids was calculated within the first year<br><b>Timing:</b> 12 months in treatment | Logistic Regression                | Not significant, but statistics not reported.                                                                                                                                                                                                                                                                                  |
| Lions, 2014 (4)   | France  | Secondary RCT analysis, 45 weeks                        | 158 (15.19%)           | <b>Method:</b> Opiate Treatment Index<br><b>Definition:</b> Dichotomous; Daily users vs. non-daily users<br><b>Timing:</b> Baseline and 12 months                                       | <b>Method:</b> Opiate Treatment Index<br><b>Definition:</b> Dichotomous; Opiate users vs. non-opiate users (used opiates at least once in the past month)<br><b>Timing:</b> 12 months    | Multiple logistic regression       | <b>Pre-treatment daily cannabis:</b><br>OR=1.46 (0.61-3.77), ns<br><b>In-treatment daily cannabis:</b><br>OR=2.81 (1.22-6.48), p<.05                                                                                                                                                                                           |
| Nava, 2007 (5)    | Italy   | Prospective cohort, 12 months                           | 121 (14%)              | <b>Method:</b> Self report, Urinalysis<br><b>Definition:</b> Dichotomous; long term users (more than 6 months) and currently smoking at least 7                                         | <b>Method:</b> Urinalysis<br><b>Definition:</b> Continuous; Percentage positive opioid screens (missing specimens                                                                        | Hierarchical linear modelling      | <b>Cannabis users:</b><br>z=-3.42, p<.001, such that there was a reduced percentage of positive opioid urines.                                                                                                                                                                                                                 |

|  |                     |     |                                 |                                                                                                                                                                                                                                                                                                                                                                                                             |                                                                                                                                                                                                                                                                                                                                                                               |                      |                                                                                                                                                                                                                                   |
|--|---------------------|-----|---------------------------------|-------------------------------------------------------------------------------------------------------------------------------------------------------------------------------------------------------------------------------------------------------------------------------------------------------------------------------------------------------------------------------------------------------------|-------------------------------------------------------------------------------------------------------------------------------------------------------------------------------------------------------------------------------------------------------------------------------------------------------------------------------------------------------------------------------|----------------------|-----------------------------------------------------------------------------------------------------------------------------------------------------------------------------------------------------------------------------------|
|  |                     |     |                                 | times per week vs. non-users never exposed to marijuana smoking.<br><b>Timing:</b> Baseline                                                                                                                                                                                                                                                                                                                 | considered positive)<br><b>Timing:</b> Urine samples were collected once a week                                                                                                                                                                                                                                                                                               |                      | <b>Non-cannabis users:</b><br>z=-3.18, p<.001, such that there was a reduced percentage of positive opioid urines.                                                                                                                |
|  | Nirenberg, 1996 (6) | USA | Prospective cohort, 6 months    | 70 (1.42%)<br><b>Method:</b> Urinalysis<br><b>Definition:</b> Dichotomized cannabis use; and Categorical 4 groups: Group 1 - cannabis abstainers (0 positive screens); Group 2 - intermittent cannabis users (0%-33.3% positive screens); Group 3 - moderate cannabis users (33.3% to 66.6% positive screens); Group 4 - consistent cannabis users (66.6%-100% positive screens)<br><b>Timing:</b> 45 weeks | <b>Method:</b> Urinalysis;<br><b>Definition:</b> Continuous; Percentage positive opioid UDS<br><b>Timing:</b> 45 weeks                                                                                                                                                                                                                                                        | ANOVA                | <b>Dichotomized cannabis use:</b><br>F(1,68)=0.90, p=.35, ns<br><b>Four groups:</b><br>F(3,66)=1.13, p=.34, ns                                                                                                                    |
|  | Proctor, 2016* (7)  | USA | Retrospective cohort, 12 months | 2410 (40.41%)<br><b>Method:</b> Urinalysis<br><b>Definition:</b> Dichotomized cannabis use<br><b>Timing:</b> Intake, 3, 6, 9, and 12 months                                                                                                                                                                                                                                                                 | <b>Method:</b> Urinalysis<br><b>Definition:</b> Dichotomous; users vs. nonusers<br><b>Timing:</b> 3, 6, 9, 12 months                                                                                                                                                                                                                                                          | Logistic Regression  | <b>3 months:</b> Intake cannabis: OR=1.17 (0.83-1.63)<br><b>6 months:</b> Intake cannabis: OR=0.59 (0.32-1.10)<br><b>9 months:</b> Intake cannabis: OR=0.63 (0.24-1.66)<br><b>12 months:</b> Intake cannabis: OR=0.23 (0.05-1.16) |
|  | Saxon, 1996 (8)     | USA | Prospective cohort, 18 months   | 353 (38.20%)<br><b>Method:</b> Self report<br><b>Definition:</b> Categorical; seven-point scale ranging from 0 "never" to 6 "four or more times per day".<br><b>Timing:</b> 6 months prior to baseline                                                                                                                                                                                                      | <b>Method:</b> Urinalysis<br><b>Definition:</b> Dichotomous; Considered opioid users if reported use of any opioid drug other than their prescribed medication, or if they reported having administered their prescribed medication by snorting or injection in the previous 6 months. Percentage of opioid positive urine screens over 18 months<br><b>Timing:</b> 18 months | Cox regression model | r=0.06; B=0.05, ns                                                                                                                                                                                                                |
|  | Scavone, 2013 (9)   | USA | Retrospective cohort, 9 months  | 91 (36.56%)<br><b>Method:</b> Self-report, Urinalysis<br><b>Definition:</b> Dichotomized cannabis use                                                                                                                                                                                                                                                                                                       | <b>Method:</b> Urinalysis<br><b>Definition:</b> Continuous<br><b>Timing:</b> 9 months                                                                                                                                                                                                                                                                                         | ANCOVA               | r(82)=.018, p=.873, such that there was no significant relationship between frequency                                                                                                                                             |

|                                                                                  |                      |         |                                 |                                                                                            |                                                                                                                                                                                           |                                                                                                                                                                                                                                                 |                                              |                                                                                                                                                                                                                                                                                                                                                                                                                       |
|----------------------------------------------------------------------------------|----------------------|---------|---------------------------------|--------------------------------------------------------------------------------------------|-------------------------------------------------------------------------------------------------------------------------------------------------------------------------------------------|-------------------------------------------------------------------------------------------------------------------------------------------------------------------------------------------------------------------------------------------------|----------------------------------------------|-----------------------------------------------------------------------------------------------------------------------------------------------------------------------------------------------------------------------------------------------------------------------------------------------------------------------------------------------------------------------------------------------------------------------|
|                                                                                  |                      |         |                                 | <b>Timing:</b> Baseline (self-report) and In-treatment (initial 9 months of MMT enrolment) |                                                                                                                                                                                           |                                                                                                                                                                                                                                                 | of cannabis use in treatment and opiate use. |                                                                                                                                                                                                                                                                                                                                                                                                                       |
| 1<br>2<br>3<br>4<br>5<br>6<br>7<br>8<br>9                                        | Somers, 2012 (10)    | Ireland | Retrospective cohort, 15 months | 123                                                                                        | <b>Method:</b> Urinalysis<br><b>Definition:</b> Dichotomous cannabis use<br><b>Timing:</b> Baseline and in-Treatment; intake, 3, 9 and 15 months                                          | <b>Method:</b> Urinalysis<br><b>Definition:</b> Dichotomous; Subjects with less than 20 % of samples positive for heroin<br><b>Timing:</b> 3,9,15 months                                                                                        | Logistic regression                          | <b>Baseline:</b> OR: 0.88 (.67-1.15)<br><b>3 month:</b> OR: 0.79 (.58, 1.1)<br><b>9 month:</b> OR: 0.78 (.55, 1.2)<br><b>15 months:</b> OR: 1.45 (.82, 2.5)<br><b>Total:</b> AOR: 0.32 (.06, 1.66)                                                                                                                                                                                                                    |
| 10<br>11<br>12<br>13<br>14<br>15<br>16<br>17<br>18<br>19<br>20<br>21<br>22<br>23 | Wasserman, 1998 (11) | USA     | Prospective cohort, 6 months    | 74 (40.54%)                                                                                | <b>Method:</b> Urinalysis<br><b>Definition:</b> Dichotomized cannabis use<br><b>Timing:</b> Baseline cannabis (first week) and cannabis as a time-dependent variable included in analyses | <b>Method:</b> Self-report or urinalysis;<br><b>Definition:</b> Dichotomous; Participants dichotomized as having used heroin during the period from week 2 through the 6-month follow-up assessment or not.<br><b>Timing:</b> 6 month follow-up | Cox proportional hazards regression          | $\chi^2=8.39$ , $p<0.004$ ., such that baseline cannabis use significantly increased the risk of a lapse to heroin.<br>$\chi^2=7.62$ , $p<0.006$ , such that cannabis as a time-dependent variable significantly increased the risk of a lapse to heroin.<br><b>6-month follow-up:</b><br>$\chi^2=7.90$ , $p<0.005$ , such that such that baseline cannabis use significantly increased the risk of a lapse to heroin |
| 24<br>25<br>26<br>27<br>28<br>29                                                 | Zielinski, 2017 (12) | Canada  | Cross-sectional                 | 777 (46.7%)                                                                                | <b>Method:</b> MAP<br><b>Definition:</b> Dichotomized cannabis use in the past 30 days<br><b>Timing:</b> Baseline cannabis                                                                | <b>Method:</b> Urinalysis<br><b>Definition:</b> Dichotomous; participants with any positive screens of illicit opioids<br><b>Timing:</b> 3 month testing period                                                                                 | Multivariable logistic regression analysis   | OR: 1.16, 95%CI: 0.77, 1.75, $p=0.49$                                                                                                                                                                                                                                                                                                                                                                                 |

Notes: "Dichotomized cannabis use" means users vs. non-users or at least one positive urine screen vs. none unless otherwise specified. MAP: Maudsley Addiction Profile; HR: hazard ratio; ANOVA: analysis of variance; RCT: randomized controlled trial; ns: not significant; UDS: urine drug screen; MMT: methadone maintenance treatment; ANCOVA: analysis of covariance; OR: odds ratio. \*Proctor et al. (2016) had too many results to present in this table, so we included only intake cannabis values in relation to opioid use at all time points. See study for more results.



## B. Treatment Retention

| Study             | Country        | Study Design                      | Sample size (% female) | Cannabis Measurement                                                                                                                                                                                                                        | Outcome                                                                                                                                                                                 | Statistical Analysis                                       | Results                                                                                                                                                                                                                                      |
|-------------------|----------------|-----------------------------------|------------------------|---------------------------------------------------------------------------------------------------------------------------------------------------------------------------------------------------------------------------------------------|-----------------------------------------------------------------------------------------------------------------------------------------------------------------------------------------|------------------------------------------------------------|----------------------------------------------------------------------------------------------------------------------------------------------------------------------------------------------------------------------------------------------|
| Epstein, 2003 (2) | USA            | Secondary RCT analysis, 12 months | 408 (40.44%)           | <b>Method:</b> Diagnostic Interview and urinalysis<br><b>Definition:</b> Categorical; Non-users, occasional users and frequent users<br><b>Timing:</b> Time to dropout                                                                      | <b>Definition:</b> Retention in clinical trials up till follow up<br><b>Timing:</b> Did they complete the follow ups to 12 months                                                       | Survival analysis for treatment retention for all 3 trials | In all 3 trials, p-values ranged from p=.69 to p=.72 Further statistics not reported.                                                                                                                                                        |
| Joe, 1998 (13)    | USA            | Prospective cohort, 360 days      | 981 (39%)              | <b>Method:</b> Self-report<br><b>Definition:</b> Dichotomous; At least weekly marijuana use or not<br><b>Timing:</b> Baseline                                                                                                               | <b>Definition:</b> Whether clients stayed at least 360 days in outpatient methadone treatment.<br><b>Timing:</b> 360 days into treatment                                                | Hierarchical linear regression model                       | b=0.13, SE=0.16, t=0.79, OR=1.14, ns                                                                                                                                                                                                         |
| Levine, 2015 (3)  | USA            | Retrospective cohort, 1 year      | 290 (40.34%)           | <b>Method:</b> Urinalysis<br><b>Definition:</b> Dichotomized cannabis use<br><b>Timing:</b> Baseline within the First month of drug testing upon entry into MMT                                                                             | <b>Definition:</b> Dichotomized into two groups: less than a year and more than a year<br><b>Timing:</b> 12 months after treatment                                                      | Logistic regression                                        | <b>Men:</b> cannabis-negative: OR=5.00 (1.61-14.29), p=.01, such that less cannabis use predicted >1 year retention<br><b>Women</b> cannabis-negative: OR=9.09 (2.33-33.33), p<.001, such that less cannabis use predicted >1 year retention |
| Nava, 2007 (5)    | Italy          | Prospective cohort, 12 months     | 121 (13.22%)           | <b>Method:</b> Self report, Urinalysis<br><b>Definition:</b> Dichotomous; long term users (more than 6 months) and currently smoking at least 7 times per week vs. non-users never exposed to marijuana smoking.<br><b>Timing:</b> Baseline | <b>Definition:</b> Percentage dropout from treatment measured<br><b>Timing:</b> 2 weeks, 3 months, and 12 months                                                                        | Kaplan-Meier survival analysis                             | No significant association (values not reported).                                                                                                                                                                                            |
| Peles, 2006 (14)  | Israel         | Prospective cohort, 11 years      | 492 (27.24%)           | <b>Method:</b> Urinalysis<br><b>Definition:</b> Dichotomized cannabis use<br><b>Timing:</b> 13 months or month before dropout                                                                                                               | <b>Definition:</b> Continuous; The number of days in clinic from first admission until the patient quit treatment or until the end of follow-up (11 years)<br><b>Timing:</b> 132 months | Fishers exact test                                         | <b>Cannabis use on admission:</b> p=0.3, ns                                                                                                                                                                                                  |
| Peles, 2008 (15)  | USA and Israel | Prospective cohort, 12 months     | 794 (30.98%)           | <b>Method:</b> Weekly urinalysis;<br><b>Definition:</b> Dichotomized cannabis use                                                                                                                                                           | <b>Definition:</b> Continuous; Duration in clinic from first admission until the patient stopped treatment or                                                                           | Kaplan-Meier survival analysis with                        | <b>Tel Aviv:</b> Positive THC on admission: log rank=0.2, p=.8                                                                                                                                                                               |

|    |                    |        |                                 |                                                                                                                                                                                                                                                                                                                                  |                                                                                                                                                                                |                                    |                                                                                                                                                                                                                                                      |
|----|--------------------|--------|---------------------------------|----------------------------------------------------------------------------------------------------------------------------------------------------------------------------------------------------------------------------------------------------------------------------------------------------------------------------------|--------------------------------------------------------------------------------------------------------------------------------------------------------------------------------|------------------------------------|------------------------------------------------------------------------------------------------------------------------------------------------------------------------------------------------------------------------------------------------------|
| 1  |                    |        |                                 | <b>Timing:</b> Baseline and in-treatment For follow-up, recorded cannabis use month after completion or one month before if early dropout                                                                                                                                                                                        | until the end of the follow-up<br><b>Timing:</b> Analyzed 6 months retention and 1 year retention in treatment                                                                 | log rank for cumulative retention. | Positive THC after 1 year: log rank=1.8, p=.2<br><b>Las Vegas:</b><br>Positive THC on admission: log rank=4.2, p=.04<br>Positive THC after 1 year: log rank=0.8, p=.4<br>Included in multivariate analysis but not significant (values not provided) |
| 2  |                    |        |                                 |                                                                                                                                                                                                                                                                                                                                  |                                                                                                                                                                                |                                    |                                                                                                                                                                                                                                                      |
| 3  |                    |        |                                 |                                                                                                                                                                                                                                                                                                                                  |                                                                                                                                                                                |                                    |                                                                                                                                                                                                                                                      |
| 4  |                    |        |                                 |                                                                                                                                                                                                                                                                                                                                  |                                                                                                                                                                                |                                    |                                                                                                                                                                                                                                                      |
| 5  |                    |        |                                 |                                                                                                                                                                                                                                                                                                                                  |                                                                                                                                                                                |                                    |                                                                                                                                                                                                                                                      |
| 6  |                    |        |                                 |                                                                                                                                                                                                                                                                                                                                  |                                                                                                                                                                                |                                    |                                                                                                                                                                                                                                                      |
| 7  |                    |        |                                 |                                                                                                                                                                                                                                                                                                                                  |                                                                                                                                                                                |                                    |                                                                                                                                                                                                                                                      |
| 8  |                    |        |                                 |                                                                                                                                                                                                                                                                                                                                  |                                                                                                                                                                                |                                    |                                                                                                                                                                                                                                                      |
| 9  |                    |        |                                 |                                                                                                                                                                                                                                                                                                                                  |                                                                                                                                                                                |                                    |                                                                                                                                                                                                                                                      |
| 10 |                    |        |                                 |                                                                                                                                                                                                                                                                                                                                  |                                                                                                                                                                                |                                    |                                                                                                                                                                                                                                                      |
| 11 | Saxon, 1996 (8)    | USA    | Prospective cohort, 18 months   | 353 (38.20%)<br><b>Method:</b> Self report<br><b>Definition:</b> Categorical; seven-point scale ranging from 0 "never" to 6 "four or more times per day".<br><b>Timing:</b> 6 months prior to baseline                                                                                                                           | <b>Definition:</b> subjects remaining in treatment continuously after enrolment and those not remaining<br><b>Timing:</b> 18 months after enrolment                            | Cox regression analysis            | r=0.06; B=1.08 (0.97-1.2), ns                                                                                                                                                                                                                        |
| 12 |                    |        |                                 |                                                                                                                                                                                                                                                                                                                                  |                                                                                                                                                                                |                                    |                                                                                                                                                                                                                                                      |
| 13 |                    |        |                                 |                                                                                                                                                                                                                                                                                                                                  |                                                                                                                                                                                |                                    |                                                                                                                                                                                                                                                      |
| 14 |                    |        |                                 |                                                                                                                                                                                                                                                                                                                                  |                                                                                                                                                                                |                                    |                                                                                                                                                                                                                                                      |
| 15 |                    |        |                                 |                                                                                                                                                                                                                                                                                                                                  |                                                                                                                                                                                |                                    |                                                                                                                                                                                                                                                      |
| 16 |                    |        |                                 |                                                                                                                                                                                                                                                                                                                                  |                                                                                                                                                                                |                                    |                                                                                                                                                                                                                                                      |
| 17 |                    |        |                                 |                                                                                                                                                                                                                                                                                                                                  |                                                                                                                                                                                |                                    |                                                                                                                                                                                                                                                      |
| 18 |                    |        |                                 |                                                                                                                                                                                                                                                                                                                                  |                                                                                                                                                                                |                                    |                                                                                                                                                                                                                                                      |
| 19 | Scavone, 2013 (9)  | USA    | Retrospective cohort, 9 months  | 91 (39.56%)<br><b>Method:</b> Self-report, Urinalysis<br><b>Definition:</b> Dichotomized cannabis use<br><b>Timing:</b> Baseline (self-report) and In-treatment (urinalysis from initial 9 months of MMT enrolment)                                                                                                              | <b>Definition:</b> Mean number of patients dropped out<br><b>Timing:</b> 9 months into treatment                                                                               | Pearson correlation, chi square    | Unfavourable discharge status: r(80)=.069, p=.567, ns<br>Premature discharge status: $\chi^2 = 3.009$ , p=.222, ns                                                                                                                                   |
| 20 |                    |        |                                 |                                                                                                                                                                                                                                                                                                                                  |                                                                                                                                                                                |                                    |                                                                                                                                                                                                                                                      |
| 21 |                    |        |                                 |                                                                                                                                                                                                                                                                                                                                  |                                                                                                                                                                                |                                    |                                                                                                                                                                                                                                                      |
| 22 |                    |        |                                 |                                                                                                                                                                                                                                                                                                                                  |                                                                                                                                                                                |                                    |                                                                                                                                                                                                                                                      |
| 23 |                    |        |                                 |                                                                                                                                                                                                                                                                                                                                  |                                                                                                                                                                                |                                    |                                                                                                                                                                                                                                                      |
| 24 |                    |        |                                 |                                                                                                                                                                                                                                                                                                                                  |                                                                                                                                                                                |                                    |                                                                                                                                                                                                                                                      |
| 25 |                    |        |                                 |                                                                                                                                                                                                                                                                                                                                  |                                                                                                                                                                                |                                    |                                                                                                                                                                                                                                                      |
| 26 |                    |        |                                 |                                                                                                                                                                                                                                                                                                                                  |                                                                                                                                                                                |                                    |                                                                                                                                                                                                                                                      |
| 27 | Schiff, 2007 (16)  | Israel | Retrospective cohort, 13 months | 2,683 (14.07%)<br><b>Method:</b> Urinalysis<br><b>Definition:</b> Dichotomized cannabis use<br><b>Timing:</b> Baseline and in-treatment; 13 months into treatment                                                                                                                                                                | <b>Definition:</b> Dichotomized patients as 100% retention vs. lower<br><b>Timing:</b> 13 months into treatment                                                                | Logistic regression                | OR=1.43 (1.15, 1.78), p<.001, such that there was a significant relationship between cannabis use and increased retention.                                                                                                                           |
| 28 |                    |        |                                 |                                                                                                                                                                                                                                                                                                                                  |                                                                                                                                                                                |                                    |                                                                                                                                                                                                                                                      |
| 29 |                    |        |                                 |                                                                                                                                                                                                                                                                                                                                  |                                                                                                                                                                                |                                    |                                                                                                                                                                                                                                                      |
| 30 |                    |        |                                 |                                                                                                                                                                                                                                                                                                                                  |                                                                                                                                                                                |                                    |                                                                                                                                                                                                                                                      |
| 31 |                    |        |                                 |                                                                                                                                                                                                                                                                                                                                  |                                                                                                                                                                                |                                    |                                                                                                                                                                                                                                                      |
| 32 |                    |        |                                 |                                                                                                                                                                                                                                                                                                                                  |                                                                                                                                                                                |                                    |                                                                                                                                                                                                                                                      |
| 33 | Weizman, 2004 (17) | Israel | Prospective cohort, 12 months   | 283 (NR)<br><b>Method:</b> Urinalysis<br><b>Definition:</b> Dichotomous; Cannabis abuse vs. not; First assessed the percentage of tests positive for a given month (first month and 12th month); second considered that is a patient tested positive for cannabis for any consecutive 3 months during the first year of MMT, was | <b>Definition:</b> Treatment tenure was calculated based upon the overall number of days patients remained in treatment; Continuous<br><b>Timing:</b> 12 months into treatment | Cox regression survival analysis   | Non-CAs vs CAs, B=-0.17; SE=0.13; Wald=1.57, p=0.21; r=0.00; Exp(B)=0.84<br>Analysis with heroin, cocaine, and BZD abuse as covariates did not significantly change the results.                                                                     |
| 34 |                    |        |                                 |                                                                                                                                                                                                                                                                                                                                  |                                                                                                                                                                                |                                    |                                                                                                                                                                                                                                                      |
| 35 |                    |        |                                 |                                                                                                                                                                                                                                                                                                                                  |                                                                                                                                                                                |                                    |                                                                                                                                                                                                                                                      |
| 36 |                    |        |                                 |                                                                                                                                                                                                                                                                                                                                  |                                                                                                                                                                                |                                    |                                                                                                                                                                                                                                                      |
| 37 |                    |        |                                 |                                                                                                                                                                                                                                                                                                                                  |                                                                                                                                                                                |                                    |                                                                                                                                                                                                                                                      |
| 38 |                    |        |                                 |                                                                                                                                                                                                                                                                                                                                  |                                                                                                                                                                                |                                    |                                                                                                                                                                                                                                                      |
| 39 |                    |        |                                 |                                                                                                                                                                                                                                                                                                                                  |                                                                                                                                                                                |                                    |                                                                                                                                                                                                                                                      |
| 40 |                    |        |                                 |                                                                                                                                                                                                                                                                                                                                  |                                                                                                                                                                                |                                    |                                                                                                                                                                                                                                                      |
| 41 |                    |        |                                 |                                                                                                                                                                                                                                                                                                                                  |                                                                                                                                                                                |                                    |                                                                                                                                                                                                                                                      |
| 42 |                    |        |                                 |                                                                                                                                                                                                                                                                                                                                  |                                                                                                                                                                                |                                    |                                                                                                                                                                                                                                                      |
| 43 |                    |        |                                 |                                                                                                                                                                                                                                                                                                                                  |                                                                                                                                                                                |                                    |                                                                                                                                                                                                                                                      |
| 44 |                    |        |                                 |                                                                                                                                                                                                                                                                                                                                  |                                                                                                                                                                                |                                    |                                                                                                                                                                                                                                                      |

|    |                  |     |                                    |                                                                                                                                            |                                                                                                            |                                                                                                         |                                     |                                                                                                                                                                                                                                      |
|----|------------------|-----|------------------------------------|--------------------------------------------------------------------------------------------------------------------------------------------|------------------------------------------------------------------------------------------------------------|---------------------------------------------------------------------------------------------------------|-------------------------------------|--------------------------------------------------------------------------------------------------------------------------------------------------------------------------------------------------------------------------------------|
| 1  |                  |     |                                    | considered a potential cannabis abuser. SCID used to confirm or disconfirm cannabis abuse status.<br><b>Timing:</b> Baseline and 12 months |                                                                                                            |                                                                                                         |                                     |                                                                                                                                                                                                                                      |
| 2  |                  |     |                                    |                                                                                                                                            |                                                                                                            |                                                                                                         |                                     |                                                                                                                                                                                                                                      |
| 3  |                  |     |                                    |                                                                                                                                            |                                                                                                            |                                                                                                         |                                     |                                                                                                                                                                                                                                      |
| 4  |                  |     |                                    |                                                                                                                                            |                                                                                                            |                                                                                                         |                                     |                                                                                                                                                                                                                                      |
| 5  | White, 2014 (18) | USA | Retrospective cohort, 15-17 months | 604 (39.40%)                                                                                                                               | <b>Method:</b> Urinalysis<br><b>Definition:</b> Dichotomized cannabis use<br><b>Timing:</b> First 3 months | <b>Definition:</b> Dichotomized retention as left MMT or remained in MMT<br><b>Timing:</b> 15-17 months | Chi square<br>Fishers Exact<br>Test | <b>Baseline cannabis use:</b><br>OR: 3.3 (1.6-6.8), p<.01, such that cannabis use was significantly associated with increased attrition rates.<br><b>Positive ONLY for cannabis at baseline:</b> 5%<br>OR: 0.5 (0.7-9.8), p=1.00, ns |
| 6  |                  |     |                                    |                                                                                                                                            |                                                                                                            |                                                                                                         |                                     |                                                                                                                                                                                                                                      |
| 7  |                  |     |                                    |                                                                                                                                            |                                                                                                            |                                                                                                         |                                     |                                                                                                                                                                                                                                      |
| 8  |                  |     |                                    |                                                                                                                                            |                                                                                                            |                                                                                                         |                                     |                                                                                                                                                                                                                                      |
| 9  |                  |     |                                    |                                                                                                                                            |                                                                                                            |                                                                                                         |                                     |                                                                                                                                                                                                                                      |
| 10 |                  |     |                                    |                                                                                                                                            |                                                                                                            |                                                                                                         |                                     |                                                                                                                                                                                                                                      |
| 11 |                  |     |                                    |                                                                                                                                            |                                                                                                            |                                                                                                         |                                     |                                                                                                                                                                                                                                      |
| 12 |                  |     |                                    |                                                                                                                                            |                                                                                                            |                                                                                                         |                                     |                                                                                                                                                                                                                                      |
| 13 |                  |     |                                    |                                                                                                                                            |                                                                                                            |                                                                                                         |                                     |                                                                                                                                                                                                                                      |

Notes: "Dichotomized cannabis use" means users vs. non-users or at least one positive urine screen vs. none unless otherwise specified. RCT: randomized controlled trial; SE: standard error; OR: odds ratio; ns: not significant; MMT: methadone maintenance treatment; THC: tetrahydrocannabinol; NR: not reported; SCID: Structured Clinical Interview for DSM disorders; CA: cannabis abuser.

Confidential

## C. Polydrug Use

| Study               | Country | Study Design                      | Sample size (% female) | Cannabis Measurement                                                                                                                                                                                                                                                                                                   | Outcome                                                                                                                                                                       | Statistical Analysis         | Results                                                                                                                                                                                                                                                                                                                          |
|---------------------|---------|-----------------------------------|------------------------|------------------------------------------------------------------------------------------------------------------------------------------------------------------------------------------------------------------------------------------------------------------------------------------------------------------------|-------------------------------------------------------------------------------------------------------------------------------------------------------------------------------|------------------------------|----------------------------------------------------------------------------------------------------------------------------------------------------------------------------------------------------------------------------------------------------------------------------------------------------------------------------------|
| Best, 1999 (1)      | UK      | Cross sectional                   | 200 (30%)              | <b>Method:</b> MAP<br><b>Definition:</b> Classified participants as daily users, occasional users, and non-users; categorical<br><b>Timing:</b> Baseline                                                                                                                                                               | <b>Method:</b> MAP<br><b>Definition:</b> Measured alcohol and crack cocaine use; continuous<br><b>Timing:</b> 30 days after MAP                                               | ANOVA; post-hoc Scheffe test | <b>Alcohol:</b> F=5.24, p<.01<br>Scheffe test: significant difference such that non-users of cannabis consumed more alcohol than occasional and daily users<br><b>Crack cocaine:</b> F=4.67, p<.05<br>Scheffe test: significant difference such that non-users of cannabis consumed more alcohol than occasional and daily users |
| Bleich, 1999 (19)   | Israel  | Prospective cohort, 12 months     | 148 (29.82%)           | <b>Method:</b> Urinalysis<br><b>Definition:</b> A positive urine test for cannabis. A drug abuser for any substance of abuse was defined as having a positive urine test for that substance during the 12th month of treatment.<br><b>Timing:</b> 12 months into treatment                                             | <b>Method:</b> Urinalysis<br><b>Definition:</b> Benzodiazepines; A positive urine test for benzodiazepines non-abusers vs. abusers<br><b>Timing:</b> 12 months into treatment | Chi square                   | <b>Benzodiazepine:</b><br>$\chi^2 = 7.77$ , p=0.005, such that benzodiazepine abusers were more likely to currently abuse cannabis than non abusers of benzodiazepine                                                                                                                                                            |
| Epstein, 2003 (2)   | USA     | Secondary RCT analysis, 12 months | 408 (40.44%)           | <b>Method:</b> Diagnostic Interview and urinalysis<br><b>Definition:</b> Categorical; Non-users, occasional users and frequent users<br><b>Timing:</b> Baseline and 12 months                                                                                                                                          | <b>Method:</b> Urinalysis<br><b>Definition:</b> Continuous; Cocaine use from urinalysis<br><b>Timing:</b> Entire study duration                                               | Multiple linear regression   | <b>Cocaine abstinence:</b><br>Parameter estimate +/- SEM: 11.49 +/- 5.68, t=2.02, p=0.0438                                                                                                                                                                                                                                       |
| Nirenberg, 1996 (6) | USA     | Prospective cohort, 45 weeks      | 70 (1.43%)             | <b>Method:</b> Urinalysis<br><b>Definition:</b> Dichotomous and Categorical; 4 groups: Group 1 - cannabis abstainers (0 positive screens); Group 2 - intermittent cannabis users (0%-33.3% positive screens); Group 3 - moderate cannabis users (33.3% to 66.6% positive screens); Group 4 - consistent cannabis users | <b>Method:</b> Urinalysis<br><b>Definition:</b> Continuous; Cocaine and benzodiazepine use<br><b>Timing:</b> 45 weeks                                                         | ANOVA                        | <b>Cocaine:</b><br>F(3,66)=1.17, p=.33 such that there was no significant difference between the 4 cannabis groups and their use of cocaine.<br><b>Benzodiazepines:</b><br>F(3,66)=2.10, p=.11, such that there was no significant difference between the 4 cannabis groups and their use of benzodiazepine.                     |

|                                                                                                          |                   |     |                                  |                                                          |                                                                                                                                                                                                                                                                                                                                                                            |                                                                                                                                                                                                          |                        |                                                                                                                                                                                                                                                                                                                                                                                                                                                                                   |
|----------------------------------------------------------------------------------------------------------|-------------------|-----|----------------------------------|----------------------------------------------------------|----------------------------------------------------------------------------------------------------------------------------------------------------------------------------------------------------------------------------------------------------------------------------------------------------------------------------------------------------------------------------|----------------------------------------------------------------------------------------------------------------------------------------------------------------------------------------------------------|------------------------|-----------------------------------------------------------------------------------------------------------------------------------------------------------------------------------------------------------------------------------------------------------------------------------------------------------------------------------------------------------------------------------------------------------------------------------------------------------------------------------|
|                                                                                                          |                   |     |                                  | (66.6%-100% positive screens)<br><b>Timing:</b> 45 weeks |                                                                                                                                                                                                                                                                                                                                                                            |                                                                                                                                                                                                          |                        |                                                                                                                                                                                                                                                                                                                                                                                                                                                                                   |
| 1<br>2<br>3<br>4<br>5<br>6<br>7<br>8<br>9<br>10<br>11<br>12<br>13                                        | Peirce, 2009 (20) | USA | Secondary RCT analysis, 12 weeks | 386 (44%)                                                | <b>Method:</b> Urinalysis. breath sample<br><b>Definition:</b> Cannabis use defined as positive urine/breath sample given at study intake<br><b>Timing:</b> at intake<br>Cannabis use disorder defined as the interview administered checklist of DSM-IV substance use disorder symptoms                                                                                   | <b>Method:</b> Urinalysis, breath sample<br><b>Definition:</b> Stimulant use measured as number of stimulant-negative urine results provided<br><b>Timing:</b> Throughout the 12 week study intervention | Mixed-model regression | <b>Cannabis use at intake:</b><br>B(SE) = -3.27 (1.33), p=0.014, such that participants showed more stimulant use (less negative urine tests).<br><b>Cannabis use disorder:</b><br>B(SE) = 3.89(1.49), p=0.010, such that participants showed less stimulant use (more negative urine tests).                                                                                                                                                                                     |
| 14<br>15<br>16<br>17<br>18<br>19<br>20<br>21<br>22<br>23<br>24                                           | Saxon, 1996 (8)   | USA | Prospective cohort, 18 months    | 353 (38.20%)                                             | <b>Method:</b> Self-reported seven-point scale ranging from 0 "never" to 6 "four or more times per day".<br><b>Definition:</b> Categorical;<br><b>Timing:</b> 6 months prior to baseline                                                                                                                                                                                   | <b>Method:</b> Urinalysis<br><b>Definition:</b> Continuous; percentage positive urine screens for any drug use then cocaine use, specifically<br><b>Timing:</b> 18 months in treatment                   | Cox regression model   | <b>Any drug use:</b><br>Model 1: r=-0.05; B=0.06<br>Not included in second model.<br><b>Cocaine use:</b><br>Model 1: r=-0.08; B=-0.09<br>Model 2: B=-0.11, p<0.05, such that pre-treatment frequency of cannabis use predicted less cocaine use                                                                                                                                                                                                                                   |
| 25<br>26<br>27<br>28<br>29<br>30<br>31<br>32<br>33<br>34<br>35<br>36<br>37<br>38<br>39<br>40<br>41<br>42 | Saxon, 1993 (21)  | USA | Cross sectional                  | 98 (0%)                                                  | <b>Method:</b> Urinalysis;<br><b>Definition:</b> Dichotomized cannabis use<br><b>Timing:</b> During the study period, specimens were periodically tested for THC. The number of tests for THC per subject varied from 1 to 17 (median=4). THC testing was generally spread over the duration of the study so that subjects were tested periodically over a span of months. | <b>Method:</b> Urinalysis<br><b>Definition:</b> Continuous; screened for opiates, cocaine, and benzodiazepines.<br><b>Timing:</b> Weekly tests during entire treatment                                   | Mann-Whitney U-test    | <b>THC+ vs. THC-:</b><br>Percentage of urinalysis positive for other drugs of abuse was not significantly different between THC+ (median=6.5, mean rank=50.74) and THC- patients (median=6.3, mean rank=48.0; z=-0.48).<br><b>Consistently THC+:</b> Participants consistently THC+ had a smaller percentage of urinalysis positive for other drugs of abuse (median=3.25, mean rank=21.7) than those who were intermittently THC+ (median=8.2, mean rank=31.5; z=-2.27, p<0.05). |
| 43<br>44                                                                                                 | Scavone, 2013 (9) | USA | Retrospective cohort, 9          | 91 (39.56%)                                              | <b>Method:</b> Self-report, Urinalysis<br><b>Definition:</b> Dichotomized                                                                                                                                                                                                                                                                                                  | <b>Method:</b> Urinalysis<br><b>Definition:</b> Any illicit                                                                                                                                              | Correlation            | <b>Benzodiazepine:</b><br>r(91)=.374, p<.01, such that there                                                                                                                                                                                                                                                                                                                                                                                                                      |



|    |                    |        |                               |                                                                                                                            |                                                                                                                                                                                                                                                                                                                                                                                                                                                                 |                                                                                                                                                                                                                                |                                                                                                                                                                                                                                                                                                                                                                                  |
|----|--------------------|--------|-------------------------------|----------------------------------------------------------------------------------------------------------------------------|-----------------------------------------------------------------------------------------------------------------------------------------------------------------------------------------------------------------------------------------------------------------------------------------------------------------------------------------------------------------------------------------------------------------------------------------------------------------|--------------------------------------------------------------------------------------------------------------------------------------------------------------------------------------------------------------------------------|----------------------------------------------------------------------------------------------------------------------------------------------------------------------------------------------------------------------------------------------------------------------------------------------------------------------------------------------------------------------------------|
| 1  |                    | months |                               | cannabis use<br><b>Timing:</b> Baseline (self-report) and In-treatment (urinalysis from initial 9 months of MMT enrolment) | benzodiazepine use<br>Timing: In-treatment (Initial 9 months of MMT enrolment)                                                                                                                                                                                                                                                                                                                                                                                  |                                                                                                                                                                                                                                | was a positive correlation between rates of cannabis use and illicit benzodiazepine use during the initial nine months in treatment                                                                                                                                                                                                                                              |
| 2  |                    |        |                               |                                                                                                                            |                                                                                                                                                                                                                                                                                                                                                                                                                                                                 |                                                                                                                                                                                                                                |                                                                                                                                                                                                                                                                                                                                                                                  |
| 3  |                    |        |                               |                                                                                                                            |                                                                                                                                                                                                                                                                                                                                                                                                                                                                 |                                                                                                                                                                                                                                |                                                                                                                                                                                                                                                                                                                                                                                  |
| 4  |                    |        |                               |                                                                                                                            |                                                                                                                                                                                                                                                                                                                                                                                                                                                                 |                                                                                                                                                                                                                                |                                                                                                                                                                                                                                                                                                                                                                                  |
| 5  |                    |        |                               |                                                                                                                            |                                                                                                                                                                                                                                                                                                                                                                                                                                                                 |                                                                                                                                                                                                                                |                                                                                                                                                                                                                                                                                                                                                                                  |
| 6  | Strain, 1991 (22)  | USA    | Cross sectional               | 66 (45%)                                                                                                                   | <b>Method:</b> Alcohol Research Center Intake Interview<br><b>Definition:</b> Dichotomous; those with versus those without a history of a cannabis use diagnosis<br><b>Timing:</b> Interviews and assessments done in a series of two to three sessions                                                                                                                                                                                                         | <b>Method:</b> Alcohol Research Center Intake Interview<br><b>Definition:</b> Cocaine, sedative, and alcohol abuse/dependence diagnoses<br><b>Timing:</b> Interviews and assessments done in a series of two to three sessions | Z-Test<br><b>Cocaine diagnosis:</b> RR=0.69, ns<br><b>Sedative diagnosis:</b> RR=1.67, ns<br><b>Alcohol diagnosis:</b> RR=0.83, ns                                                                                                                                                                                                                                               |
| 7  |                    |        |                               |                                                                                                                            |                                                                                                                                                                                                                                                                                                                                                                                                                                                                 |                                                                                                                                                                                                                                |                                                                                                                                                                                                                                                                                                                                                                                  |
| 8  |                    |        |                               |                                                                                                                            |                                                                                                                                                                                                                                                                                                                                                                                                                                                                 |                                                                                                                                                                                                                                |                                                                                                                                                                                                                                                                                                                                                                                  |
| 9  |                    |        |                               |                                                                                                                            |                                                                                                                                                                                                                                                                                                                                                                                                                                                                 |                                                                                                                                                                                                                                |                                                                                                                                                                                                                                                                                                                                                                                  |
| 10 |                    |        |                               |                                                                                                                            |                                                                                                                                                                                                                                                                                                                                                                                                                                                                 |                                                                                                                                                                                                                                |                                                                                                                                                                                                                                                                                                                                                                                  |
| 11 |                    |        |                               |                                                                                                                            |                                                                                                                                                                                                                                                                                                                                                                                                                                                                 |                                                                                                                                                                                                                                |                                                                                                                                                                                                                                                                                                                                                                                  |
| 12 |                    |        |                               |                                                                                                                            |                                                                                                                                                                                                                                                                                                                                                                                                                                                                 |                                                                                                                                                                                                                                |                                                                                                                                                                                                                                                                                                                                                                                  |
| 13 |                    |        |                               |                                                                                                                            |                                                                                                                                                                                                                                                                                                                                                                                                                                                                 |                                                                                                                                                                                                                                |                                                                                                                                                                                                                                                                                                                                                                                  |
| 14 |                    |        |                               |                                                                                                                            |                                                                                                                                                                                                                                                                                                                                                                                                                                                                 |                                                                                                                                                                                                                                |                                                                                                                                                                                                                                                                                                                                                                                  |
| 15 |                    |        |                               |                                                                                                                            |                                                                                                                                                                                                                                                                                                                                                                                                                                                                 |                                                                                                                                                                                                                                |                                                                                                                                                                                                                                                                                                                                                                                  |
| 16 |                    |        |                               |                                                                                                                            |                                                                                                                                                                                                                                                                                                                                                                                                                                                                 |                                                                                                                                                                                                                                |                                                                                                                                                                                                                                                                                                                                                                                  |
| 17 | Weizman, 2004 (17) | Israel | Prospective cohort, 12 months | 283 (NR)                                                                                                                   | <b>Method:</b> Urinalysis<br><b>Definition:</b> Dichotomous; Cannabis abuse vs. not; First assessed the percentage of tests positive for a given month (first month and 12th month); second considered that is a patient tested positive for cannabis for any consecutive 3 months during the first year of MMT, was considered a potential cannabis abuser. SCID used to confirm or disconfirm cannabis abuse status.<br><b>Timing:</b> Baseline and 12 months | <b>Method:</b> Urinalysis;<br><b>Definition:</b> Measured heroin, benzodiazepines, amphetamine, and cocaine abuse (they do not specify if they used SCID or something else to define abuse)<br><b>Timing:</b> 12 months        | ANOVA<br><b>Benzodiazepine:</b> F=18.48, p=0.000, such that CAs abused more benzodiazepines<br><b>Amphetamines:</b> F=9.29, p=0.003, such that CAs abused more amphetamines<br><b>Cocaine:</b> F=4.06, p=0.045, such that CAs abused more cocaine<br><b>All abuse and dependency diagnoses:</b> F=7.5, p=0.007, such that CAs had more other drug abuse and dependency diagnoses |
| 18 |                    |        |                               |                                                                                                                            |                                                                                                                                                                                                                                                                                                                                                                                                                                                                 |                                                                                                                                                                                                                                |                                                                                                                                                                                                                                                                                                                                                                                  |
| 19 |                    |        |                               |                                                                                                                            |                                                                                                                                                                                                                                                                                                                                                                                                                                                                 |                                                                                                                                                                                                                                |                                                                                                                                                                                                                                                                                                                                                                                  |
| 20 |                    |        |                               |                                                                                                                            |                                                                                                                                                                                                                                                                                                                                                                                                                                                                 |                                                                                                                                                                                                                                |                                                                                                                                                                                                                                                                                                                                                                                  |
| 21 |                    |        |                               |                                                                                                                            |                                                                                                                                                                                                                                                                                                                                                                                                                                                                 |                                                                                                                                                                                                                                |                                                                                                                                                                                                                                                                                                                                                                                  |
| 22 |                    |        |                               |                                                                                                                            |                                                                                                                                                                                                                                                                                                                                                                                                                                                                 |                                                                                                                                                                                                                                |                                                                                                                                                                                                                                                                                                                                                                                  |
| 23 |                    |        |                               |                                                                                                                            |                                                                                                                                                                                                                                                                                                                                                                                                                                                                 |                                                                                                                                                                                                                                |                                                                                                                                                                                                                                                                                                                                                                                  |
| 24 |                    |        |                               |                                                                                                                            |                                                                                                                                                                                                                                                                                                                                                                                                                                                                 |                                                                                                                                                                                                                                |                                                                                                                                                                                                                                                                                                                                                                                  |
| 25 |                    |        |                               |                                                                                                                            |                                                                                                                                                                                                                                                                                                                                                                                                                                                                 |                                                                                                                                                                                                                                |                                                                                                                                                                                                                                                                                                                                                                                  |
| 26 |                    |        |                               |                                                                                                                            |                                                                                                                                                                                                                                                                                                                                                                                                                                                                 |                                                                                                                                                                                                                                |                                                                                                                                                                                                                                                                                                                                                                                  |
| 27 |                    |        |                               |                                                                                                                            |                                                                                                                                                                                                                                                                                                                                                                                                                                                                 |                                                                                                                                                                                                                                |                                                                                                                                                                                                                                                                                                                                                                                  |
| 28 |                    |        |                               |                                                                                                                            |                                                                                                                                                                                                                                                                                                                                                                                                                                                                 |                                                                                                                                                                                                                                |                                                                                                                                                                                                                                                                                                                                                                                  |
| 29 |                    |        |                               |                                                                                                                            |                                                                                                                                                                                                                                                                                                                                                                                                                                                                 |                                                                                                                                                                                                                                |                                                                                                                                                                                                                                                                                                                                                                                  |
| 30 |                    |        |                               |                                                                                                                            |                                                                                                                                                                                                                                                                                                                                                                                                                                                                 |                                                                                                                                                                                                                                |                                                                                                                                                                                                                                                                                                                                                                                  |
| 31 |                    |        |                               |                                                                                                                            |                                                                                                                                                                                                                                                                                                                                                                                                                                                                 |                                                                                                                                                                                                                                |                                                                                                                                                                                                                                                                                                                                                                                  |
| 32 |                    |        |                               |                                                                                                                            |                                                                                                                                                                                                                                                                                                                                                                                                                                                                 |                                                                                                                                                                                                                                |                                                                                                                                                                                                                                                                                                                                                                                  |

Notes: "Dichotomized cannabis use" means users vs. non-users or at least one positive urine screen vs. none unless otherwise specified. MAP: Maudsley Addiction Profile; ANOVA: analysis of variance; RCT: randomized controlled trial; SEM" standard error of the mean; DSM-IV: Diagnostic and Statistical Manual of Mental Disorders, 4<sup>th</sup> Edition; SE: standard error; THC: tetrahydrocannabinol; MMT: methadone maintenance treatment; RR: risk ratio; CA: cannabis abuser; SCID: Structured Clinical Interview for DSM disorders.

### D. Criminal Activity, Jail Time

| Study             | Country   | Study Design                      | Sample size (% female) | Cannabis Measurement                                                                                                                                                                                               | Outcome                                                                                                                                                                                                                         | Statistical Analysis       | Results                                                                                                                                                                                                                                             |
|-------------------|-----------|-----------------------------------|------------------------|--------------------------------------------------------------------------------------------------------------------------------------------------------------------------------------------------------------------|---------------------------------------------------------------------------------------------------------------------------------------------------------------------------------------------------------------------------------|----------------------------|-----------------------------------------------------------------------------------------------------------------------------------------------------------------------------------------------------------------------------------------------------|
| Bell, 1997 (23)   | Australia | Prospective cohort, 12 months     | 304 (43.09%)           | <b>Method:</b> Self-report<br><b>Definition:</b> Continuous; average daily use of cannabis in past month<br><b>Timing:</b> Baseline                                                                                | <b>Method:</b> Crime scale of the Opiate Treatment Index; property offenses confirmed using police records<br><b>Definition:</b> Continuous; amount of criminal activity in past month<br><b>Timing:</b> Baseline and 12 months | Multiple linear regression | <b>Baseline:</b> Not significant, but statistics not provided<br><b>12 months:</b> Cannabis was a significant predictor, $p=0.0001$                                                                                                                 |
| Epstein, 2003 (2) | USA       | Secondary RCT analysis, 12 months | 408 (40.44%)           | <b>Method:</b> Diagnostic Interview and urinalysis<br><b>Definition:</b> Categorical; Non-users, occasional users and frequent users; Cannabis abuse/dependence diagnosis<br><b>Timing:</b> Baseline and 12 months | <b>Method:</b> ASI<br><b>Definition:</b> Illegal income, days of illegal activity, days in jail<br><b>Timing:</b> Baseline                                                                                                      | Mixed-regression           | <b>Cannabis use:</b> Cannabis use category not associated with any differences in criminal activity, statistics not provided<br><b>Cannabis abuse/dependence:</b> Days in jail: $F(1,258)=8.58$ , $p<0.0037$<br>Other measures were not significant |

Notes: RCT: randomized controlled trial; ASI: Addiction Severity Index.

### E. HIV Risk Behaviours (injection drug use, needle sharing, unprotected sex)

| Study              | Country | Study Design                  | Sample size (% female) | Cannabis Measurement                                                                                                                                                                                                                                                                                                                                                                                                                                            | Outcome                                                                                                                                                                                                                                                | Statistical Analysis | Results                                                                                |
|--------------------|---------|-------------------------------|------------------------|-----------------------------------------------------------------------------------------------------------------------------------------------------------------------------------------------------------------------------------------------------------------------------------------------------------------------------------------------------------------------------------------------------------------------------------------------------------------|--------------------------------------------------------------------------------------------------------------------------------------------------------------------------------------------------------------------------------------------------------|----------------------|----------------------------------------------------------------------------------------|
| Weizman, 2004 (17) | Israel  | Prospective cohort, 12 months | 283 (NR)               | <b>Method:</b> Urinalysis<br><b>Definition:</b> Dichotomous; Cannabis abuse vs. not; First assessed the percentage of tests positive for a given month (first month and 12th month); second considered that is a patient tested positive for cannabis for any consecutive 3 months during the first year of MMT, was considered a potential cannabis abuser. SCID used to confirm or disconfirm cannabis abuse status.<br><b>Timing:</b> Baseline and 12 months | <b>Method:</b> Clinic questionnaire<br><b>Definition:</b> Dichotomous; Whether the patient injected drugs, shared needles, performed safe sex, had sex for drugs, and had a partner who abused drugs during the past year.<br><b>Timing:</b> 12 months | ANOVA                | Cannabis abuse was not related to any of the risk behaviours. Statistics not provided. |

Notes: NR: not reported; MMT: methadone maintenance treatment; SCID: Structured Clinical Interview for DSM disorders; ANOVA: analysis of variance

**Table 2.** Risk of bias assessment using modified Newcastle Ottawa Scale (NOS)

|                | SELECTION BIAS                           | PERFORMANCE BIAS                                             |                                       | DETECTION BIAS                                      |                                                                | INFORMATION BIAS                        |                                                              |             |
|----------------|------------------------------------------|--------------------------------------------------------------|---------------------------------------|-----------------------------------------------------|----------------------------------------------------------------|-----------------------------------------|--------------------------------------------------------------|-------------|
| Study          | Is the source population representative? | Is the sample size sufficient and is there sufficient power? | Did the study adjust for confounders? | Did the study use appropriate statistical analysis? | Is there little missing data and was it handled appropriately? | Is the outcome measurement appropriate? | Is there an objective assessment of the outcome of interest? | Total Score |
| Bell 1997      | 2                                        | 2                                                            | 3                                     | 3                                                   | 2                                                              | 2                                       | 2                                                            | 16          |
| Best 1999      | 2                                        | 3                                                            | 0                                     | 1                                                   | 1                                                              | 2                                       | 0                                                            | 9           |
| Bleich 1999    | 1                                        | 1                                                            | 0                                     | 1                                                   | 1                                                              | 1                                       | 3                                                            | 8           |
| Epstein 2003   | 0                                        | 1                                                            | 2                                     | 3                                                   | 2                                                              | 3                                       | 3                                                            | 16          |
| Joe 1998       | 3                                        | 3                                                            | 2                                     | 3                                                   | 2                                                              | 3                                       | 3                                                            | 19          |
| Levine 2015    | 2                                        | 2                                                            | 3                                     | 2                                                   | 1                                                              | 3                                       | 3                                                            | 16          |
| Lions 2014     | 1                                        | 2                                                            | 0                                     | 2                                                   | 1                                                              | 3                                       | 2                                                            | 11          |
| Nava 2007      | 0                                        | 1                                                            | 0                                     | 2                                                   | 1                                                              | 2                                       | 3                                                            | 9           |
| Nirenberg 1996 | 2                                        | 1                                                            | 0                                     | 1                                                   | 1                                                              | 3                                       | 3                                                            | 11          |
| Peirce 2009    | 1                                        | 3                                                            | 3                                     | 3                                                   | 3                                                              | 3                                       | 3                                                            | 19          |
| Peles 2006     | 3                                        | 3                                                            | 0                                     | 3                                                   | 3                                                              | 3                                       | 3                                                            | 18          |
| Peles 2008     | 3                                        | 3                                                            | 1                                     | 3                                                   | 3                                                              | 3                                       | 3                                                            | 19          |
| Proctor 2016   | 3                                        | 3                                                            | 2                                     | 1                                                   | 1                                                              | 3                                       | 3                                                            | 16          |
| Saxon 1993     | 1                                        | 1                                                            | 0                                     | 1                                                   | 1                                                              | 2                                       | 3                                                            | 9           |
| Saxon 1996     | 2                                        | 2                                                            | 3                                     | 2                                                   | 2                                                              | 2                                       | 3                                                            | 16          |
| Scavone 2013   | 1                                        | 1                                                            | 0                                     | 1                                                   | 2                                                              | 1                                       | 2                                                            | 8           |
| Schiff 2007    | 3                                        | 3                                                            | 2                                     | 3                                                   | 2                                                              | 3                                       | 3                                                            | 19          |
| Somers 2012    | 2                                        | 1                                                            | 1                                     | 1                                                   | 2                                                              | 1                                       | 3                                                            | 11          |
| Strain 1991    | 2                                        | 0                                                            | 0                                     | 1                                                   | 2                                                              | 2                                       | 1                                                            | 8           |
| Wasserman 1998 | 2                                        | 0                                                            | 3                                     | 3                                                   | 3                                                              | 3                                       | 3                                                            | 17          |
| Weizman 2004   | 2                                        | 2                                                            | 0                                     | 1                                                   | 1                                                              | 1                                       | 3                                                            | 10          |
| White 2014     | 2                                        | 3                                                            | 0                                     | 1                                                   | 2                                                              | 2                                       | 3                                                            | 13          |
| Zielinski 2017 | 3                                        | 3                                                            | 3                                     | 3                                                   | 1                                                              | 2                                       | 3                                                            | 19          |

Notes: 0=definitely no (high risk of bias); 1=mostly no; 2=mostly yes; 3=definitely yes (low risk of bias). Maximum total score=21.

**Table 3.** GRADE Evidence Profile for Primary Outcomes

| Quality assessment |                       |                      |                              |              |                           |                      | Quality          | Importance |
|--------------------|-----------------------|----------------------|------------------------------|--------------|---------------------------|----------------------|------------------|------------|
| # of studies       | Study design          | Risk of bias         | Inconsistency                | Indirectness | Imprecision               | Other considerations |                  |            |
| Illicit Opioid Use |                       |                      |                              |              |                           |                      |                  |            |
| 7                  | observational studies | serious <sup>a</sup> | very serious <sup>b, c</sup> | not serious  | very serious <sup>d</sup> | none                 | ⊕○○○<br>VERY LOW | CRITICAL   |
| Retention          |                       |                      |                              |              |                           |                      |                  |            |
| 4                  | observational studies | not serious          | serious <sup>b</sup>         | not serious  | very serious <sup>d</sup> | none                 | ⊕○○○<br>VERY LOW | CRITICAL   |

**CI:** Confidence interval; **OR:** Odds ratio

a. Moderate risk of bias across studies

b. Point estimates vary widely across studies, little overlap between individual confidence intervals

c. Heterogeneity not explained by subgroup analyses

d. Small sample sizes, wide pooled 95% confidence interval

1  
2  
3  
4  
5  
6  
7  
8  
9  
10  
11  
12  
13  
14  
15  
16  
17  
18  
19  
20  
21  
22  
23  
24  
25  
26  
27  
28  
29  
30  
31  
32  
33  
34  
35  
36  
37  
38  
39  
40  
41  
42  
43  
44  
45  
46  
47  
48  
49  
50  
51  
52  
53  
54  
55  
56  
57  
58  
59  
60

Confidential

## References:

1. Best D, Gossop M, Greenwood J, Marsden J, Lehmann P, Strang J. Cannabis use in relation to illicit drug use and health problems among opiate misusers in treatment. *Drug Alcohol Rev.* 1999;18(January 1998):31–8.
2. Epstein DH, Preston KL. Does cannabis use predict poor outcome for heroin-dependent patients on maintenance treatment? Past findings and more evidence against. *Addiction.* 2003;98(3):269–79.
3. Levine AR, Lundahl LH, Ledgerwood DM, Lisieski M, Rhodes GL, Greenwald MK. Gender-Specific Predictors of Retention and Opioid Abstinence During Methadone Maintenance Treatment. *J Subst Abuse Treat* [Internet]. 2015;54:37–43. Available from: <http://dx.doi.org/10.1016/j.jsat.2015.01.009>
4. Lions C, Carrieri MP, Michel L, Mora M, Marcellin F, Morel A, et al. Predictors of non-prescribed opioid use after one year of methadone treatment: An attributable-risk approach (ANRS-Methaville trial). *Drug Alcohol Depend* [Internet]. 2014;135(1):1–8. Available from: <http://dx.doi.org/10.1016/j.drugalcdep.2013.10.018>
5. Nava F, Manzato E, Lucchini A. Chronic cannabis use does not affect the normalization of hypothalamic-pituitary-adrenal (HPA) axis induced by methadone in heroin addicts. *Prog Neuro-Psychopharmacology Biol Psychiatry.* 2007;31(5):1089–94.
6. Nirenberg TD, Cellucci T, Liepman MR, Swift RM, Sirota AID. Cannabis versus other illicit drug use among methadone maintenance patients. Vol. 10, *Psychology of addictive behaviours.* 1996. p. 222–7.
7. Proctor SL, Copeland AL, Kopak AM, Hoffmann NG, Herschman PL, Polukhina N. Outcome predictors for patients receiving methadone maintenance treatment: findings from a retrospective multi-site study. *J Subst Use* [Internet]. 2016;21(6):601–13. Available from: <http://dx.doi.org/10.3109/14659891.2015.1118564>
8. Saxon AJ, Wells EA, Fleming C, Jackson TR, Calsyn DA. Pre-treatment characteristics, program philosophy and level of ancillary services as predictors of methadone maintenance treatment outcome. *Addiction.* 1996;91(8):1197–209.
9. Scavone JL, Sterling RC, Van Bockstaele EJ. Cannabinoid and opioid interactions: Implications for opiate dependence and withdrawal. *Neuroscience* [Internet]. 2013;248:637–54. Available from: <http://dx.doi.org/10.1016/j.neuroscience.2013.04.034>
10. Scavone JL, Sterling RC, Weinstein SP, Van Bockstaele EJ. Impact of cannabis use during stabilization on methadone maintenance treatment. *Am J Addict.* 2013;(22):344–51.
11. Wasserman DA, Weinstein MG, Havassy BE, Hall SM. Factors associated with lapses to heroin use during methadone maintenance. *Drug Alcohol Depend* [Internet]. 1998;52(3):183–92. Available from:

1 <http://eutils.ncbi.nlm.nih.gov/entrez/eutils/elink.fcgi?dbfrom=pubmed&id=9839144&retmode=ref&cmd=prlinks>  
2 %5Cnfile:///Articles/1998/Wasserman/Drug Alcohol Depend 1998 Wasserman.pdf

- 3 12. Zielinski L, Bhatt M, Sanger N, Plater C, Worster A, Varenbut M, et al. Association between cannabis use and  
4 methadone maintenance treatment outcomes: an investigation into sex differences. *Biol Sex Differ*. 2017;8(1):1–  
5 10.  
6
- 7 13. Joe GW, Dwayne Simpson D, Broome KM. Effects of readiness for drug abuse treatment on client retention and  
8 assessment of process. *Addiction*. 1998;93(8):1177–90.  
9
- 10 14. Peles E, Schreiber S, Adelson M. Factors predicting retention in treatment: 10-year experience of a methadone  
11 maintenance treatment (MMT) clinic in Israel. *Drug Alcohol Depend*. 2006;82(3):211–7.  
12
- 13 15. Peles E, Linzy S, Kreek MJ, Adelson M. One-year and cumulative retention as predictors of success in methadone  
14 maintenance treatment: A comparison of two clinics in the United States and Israel. *J Addict Dis*. 2008;27(4):11–  
15 25.  
16
- 17 16. Schiff M, Levit S, Moreno RC. Retention and illicit drug use among methadone patients in Israel: A gender  
18 comparison. *Addict Behav*. 2007;32(10):2108–19.  
19
- 20 17. Weizman T, Gelkopf M, Melamed Y, Adelson M, Bleich A. Cannabis abuse is not a risk factor for treatment  
21 outcome in methadone maintenance treatment: a 1-year prospective study in an Israeli clinic. *Australas*  
22 *Psychiatry*. 2004;38:42–6.  
23
- 24 18. White WL, Campbell MD, Spencer RD, Hoffman HA, Crissman B, DuPont RL. Patterns of Abstinence or Continued  
25 Drug Use Among Methadone Maintenance Patients and Their Relation to Treatment Retention. *J Psychoactive*  
26 *Drugs [Internet]*. 2014;46(2):114–22. Available from: <http://dx.doi.org/10.1080/02791072.2014.901587>  
27  
28
- 29 19. Bleich AVI, Gelkopf M, Schmidt V, Hayward R, Bodner G, Adelson M. Correlates of benzodiazepine abuse in  
30 methadone maintenance treatment . A 1 year prospective study in an Israeli clinic. 1999;94(January).  
31
- 32 20. Peirce JM, Petry NM, Roll JM, Kolodner K, Krasnansky J, Stabile PQ, et al. Correlates of stimulant treatment  
33 outcome across treatment modalities. *Am J Drug Alcohol Abuse*. 2009;35(1):48–53.  
34
- 35 21. Saxon AJ, Calsyn DA, Greenberg D, Blaes P, Haver VM, Stanton V. Urine Screening for Marijuana Among  
36 Methadone-Maintained Patients. *Am J Addict*. 1993;2(3):207–11.  
37
- 38 22. Strain EC, Brooner RK, Bigelow GE. Clustering of multiple substance use and psychiatric diagnoses in opiate  
39 addicts. *Drug Alcohol Depend*. 1991;27(2):127–34.  
40
- 41 23. Bell, J, Mattick, R, Hay, A, Chan, J, Hall W. Methadone Maintenance and Drug-Related Crime. *J Subst Abuse*.  
42 1997;9:15–25.  
43  
44  
45  
46  
47  
48  
49  
50  
51  
52  
53  
54  
55  
56  
57  
58  
59  
60



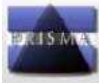

# PRISMA 2009 Checklist

1  
2  
3  
4  
5  
6  
7  
8  
9  
10  
11  
12  
13  
14  
15  
16  
17  
18  
19  
20  
21  
22  
23  
24  
25  
26  
27  
28  
29  
30  
31  
32  
33  
34  
35  
36  
37  
38  
39  
40  
41  
42  
43  
44  
45  
46  
47

| Section/topic                      | #  | Checklist item                                                                                                                                                                                                                                                                                              | Reported on page # |
|------------------------------------|----|-------------------------------------------------------------------------------------------------------------------------------------------------------------------------------------------------------------------------------------------------------------------------------------------------------------|--------------------|
| <b>TITLE</b>                       |    |                                                                                                                                                                                                                                                                                                             |                    |
| Title                              | 1  | Identify the report as a systematic review, meta-analysis, or both.                                                                                                                                                                                                                                         | 1                  |
| <b>ABSTRACT</b>                    |    |                                                                                                                                                                                                                                                                                                             |                    |
| Structured summary                 | 2  | Provide a structured summary including, as applicable: background; objectives; data sources; study eligibility criteria, participants, and interventions; study appraisal and synthesis methods; results; limitations; conclusions and implications of key findings; systematic review registration number. | 2                  |
| <b>INTRODUCTION</b>                |    |                                                                                                                                                                                                                                                                                                             |                    |
| Rationale                          | 3  | Describe the rationale for the review in the context of what is already known.                                                                                                                                                                                                                              | 3                  |
| Objectives                         | 4  | Provide an explicit statement of questions being addressed with reference to participants, interventions, comparisons, outcomes, and study design (PICOS).                                                                                                                                                  | 3                  |
| <b>METHODS</b>                     |    |                                                                                                                                                                                                                                                                                                             |                    |
| Protocol and registration          | 5  | Indicate if a review protocol exists, if and where it can be accessed (e.g., Web address), and, if available, provide registration information including registration number.                                                                                                                               | 3                  |
| Eligibility criteria               | 6  | Specify study characteristics (e.g., PICOS, length of follow-up) and report characteristics (e.g., years considered, language, publication status) used as criteria for eligibility, giving rationale.                                                                                                      | 3                  |
| Information sources                | 7  | Describe all information sources (e.g., databases with dates of coverage, contact with study authors to identify additional studies) in the search and date last searched.                                                                                                                                  | 4                  |
| Search                             | 8  | Present full electronic search strategy for at least one database, including any limits used, such that it could be repeated.                                                                                                                                                                               | 4                  |
| Study selection                    | 9  | State the process for selecting studies (i.e., screening, eligibility, included in systematic review, and, if applicable, included in the meta-analysis).                                                                                                                                                   | 4                  |
| Data collection process            | 10 | Describe method of data extraction from reports (e.g., piloted forms, independently, in duplicate) and any processes for obtaining and confirming data from investigators.                                                                                                                                  | 4                  |
| Data items                         | 11 | List and define all variables for which data were sought (e.g., PICOS, funding sources) and any assumptions and simplifications made.                                                                                                                                                                       | 4                  |
| Risk of bias in individual studies | 12 | Describe methods used for assessing risk of bias of individual studies (including specification of whether this was done at the study or outcome level), and how this information is to be used in any data synthesis.                                                                                      | 4                  |
| Summary measures                   | 13 | State the principal summary measures (e.g., risk ratio, difference in means).                                                                                                                                                                                                                               | 4                  |
| Synthesis of results               | 14 | Describe the methods of handling data and combining results of studies, if done, including measures of consistency (e.g., $I^2$ ) for each meta-analysis.                                                                                                                                                   | 4                  |

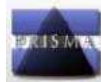

# PRISMA 2009 Checklist

Page 1 of 2

| Section/topic                 | #  | Checklist item                                                                                                                                                                                           | Reported on page # |
|-------------------------------|----|----------------------------------------------------------------------------------------------------------------------------------------------------------------------------------------------------------|--------------------|
| Risk of bias across studies   | 15 | Specify any assessment of risk of bias that may affect the cumulative evidence (e.g., publication bias, selective reporting within studies).                                                             | 4                  |
| Additional analyses           | 16 | Describe methods of additional analyses (e.g., sensitivity or subgroup analyses, meta-regression), if done, indicating which were pre-specified.                                                         | 4                  |
| <b>RESULTS</b>                |    |                                                                                                                                                                                                          |                    |
| Study selection               | 17 | Give numbers of studies screened, assessed for eligibility, and included in the review, with reasons for exclusions at each stage, ideally with a flow diagram.                                          | 5                  |
| Study characteristics         | 18 | For each study, present characteristics for which data were extracted (e.g., study size, PICOS, follow-up period) and provide the citations.                                                             | 5                  |
| Risk of bias within studies   | 19 | Present data on risk of bias of each study and, if available, any outcome level assessment (see item 12).                                                                                                | 5                  |
| Results of individual studies | 20 | For all outcomes considered (benefits or harms), present, for each study: (a) simple summary data for each intervention group (b) effect estimates and confidence intervals, ideally with a forest plot. | 5                  |
| Synthesis of results          | 21 | Present results of each meta-analysis done, including confidence intervals and measures of consistency.                                                                                                  | 5                  |
| Risk of bias across studies   | 22 | Present results of any assessment of risk of bias across studies (see Item 15).                                                                                                                          | 5                  |
| Additional analysis           | 23 | Give results of additional analyses, if done (e.g., sensitivity or subgroup analyses, meta-regression [see Item 16]).                                                                                    | 5                  |
| <b>DISCUSSION</b>             |    |                                                                                                                                                                                                          |                    |
| Summary of evidence           | 24 | Summarize the main findings including the strength of evidence for each main outcome; consider their relevance to key groups (e.g., healthcare providers, users, and policy makers).                     | 6                  |
| Limitations                   | 25 | Discuss limitations at study and outcome level (e.g., risk of bias), and at review-level (e.g., incomplete retrieval of identified research, reporting bias).                                            | 6                  |
| Conclusions                   | 26 | Provide a general interpretation of the results in the context of other evidence, and implications for future research.                                                                                  | 6                  |
| <b>FUNDING</b>                |    |                                                                                                                                                                                                          |                    |
| Funding                       | 27 | Describe sources of funding for the systematic review and other support (e.g., supply of data); role of funders for the systematic review.                                                               | 1                  |

From: Moher D, Liberati A, Tetzlaff J, Altman DG, The PRISMA Group (2009). Preferred Reporting Items for Systematic Reviews and Meta-Analyses: The PRISMA Statement. PLoS Med 6(7): e1000097. doi:10.1371/journal.pmed1000097

For more information, visit: [www.prisma-statement.org](http://www.prisma-statement.org).

**Supplemental Statistical Methods:**

Many of the odds ratios necessary for the meta-analyses were not reported in the publications we've referenced. Here we document how the statistics were calculated.

**Formula for Standard Error:**

$$SE(\log(OR)) = \sqrt{\frac{1}{a} + \frac{1}{b} + \frac{1}{c} + \frac{1}{d}}$$

a = cannabis positive AND opioid positive

b = cannabis negative AND opioid negative

c = cannabis positive AND opioid negative

d = cannabis negative AND opioid positive

**Calculation for Epstein 2003a:**

- Opiate study + Cocaine study #1
- State that rate of relapse is 80% in non-users of cannabis
- N cannabis users = 126 (frequent + non-frequent users in cocaine study 1 and opiate study)
- N non-cannabis users = 89
- 113 absent from illicit opioids  
OR = 0.189, SE = 0.307

2x2 Table

|            | + opioids | - opioids | Total |
|------------|-----------|-----------|-------|
| + cannabis | 31        | 95        | 126   |
| - cannabis | 71        | 18        | 89    |
| Total      | 102       | 113       | 215   |

**Calculation for Epstein 2003b:**

- Cocaine study #2
- Rate of relapse is 90% in non-users
- N cannabis users = 94
- N non-cannabis users = 99
- 94 absent from illicit opioids in total  
OR = 0.013376, SE = 0.4724

$$OR = a*d/b*c$$

$$100/7476 = 0.013376$$

|            | + opioids | - opioids | Total |
|------------|-----------|-----------|-------|
| + Cannabis | 10        | 84        | 94    |
| - Cannabis | 89        | 10        | 99    |
| Total      | 99        | 94        | 193   |

### Calculation for Wasserman 1998:

- **Information and relative risk calculation collected from Epstein et al., 2003**
- 35 people tested positive for cannabis
- Sample size is 74
- Opioid positives detected in 30 patients
- N non-cannabis users = 39
- 44 absent from illicit opioids
- Relative risk is  $(21/35)/(9/36) = 2.6$   
OR = 5.00, SE = 0.5133
